# Supplementary material for: Diastereoselective synthesis of tetrahydropyrrolo[1,2-d]oxadiazoles from functionalized Δ1-pyrrolines andin situgenerated nitrile oxides
Source: Royal Society of Chemistry journal article supplement (doi:10.1039/d2ob02230c), 2023-01-01

## Diastereoselective Synthesis of Tetrahydropyrrolo[1,2-*d*]oxadiazoles from Functionalized $\Delta^1$ -Pyrrolines and *in situ* Generated Nitrile Oxides

Evgeniya E. Ivanova, Dmitrii A. Shabalin,\* Igor' A. Ushakov, Alexander V. Vashchenko, Elena Yu. Schmidt, and Boris A. Trofimov\*

*A.E. Favorsky Irkutsk Institute of Chemistry SB RAS, 1 Favorsky St, Irkutsk, 664033, Russian Federation*

\*Corresponding authors: [shabalin.chemistry@gmail.com](mailto:shabalin.chemistry@gmail.com), [boris\\_trofimov@irioch.irk.ru](mailto:boris_trofimov@irioch.irk.ru)

### Table of contents

|                                                                                                               |     |
|---------------------------------------------------------------------------------------------------------------|-----|
| Reaction of pyrroline <b>1a</b> with nitrile oxide <b>6a</b> .....                                            | S2  |
| Reaction of pyrroline <b>1a</b> with aldoxime <b>2a</b> in the absence of oxidant .....                       | S3  |
| X-Ray diffraction analysis for <b>3aa</b> .....                                                               | S4  |
| References .....                                                                                              | S5  |
| <sup>1</sup> H and <sup>13</sup> C NMR Spectra of tetrahydropyrrolo[1,2- <i>d</i> ]oxadiazoles <b>3</b> ..... | S6  |
| <sup>1</sup> H and <sup>13</sup> C NMR Spectra of pyrrolinone <b>4</b> .....                                  | S27 |
| <sup>1</sup> H and <sup>13</sup> C NMR Spectra of tetrahydropyrrolo[1,2- <i>d</i> ]oxadiazole <b>5</b> .....  | S28 |

## Reaction of pyrroline 1a with nitrile oxide 6a

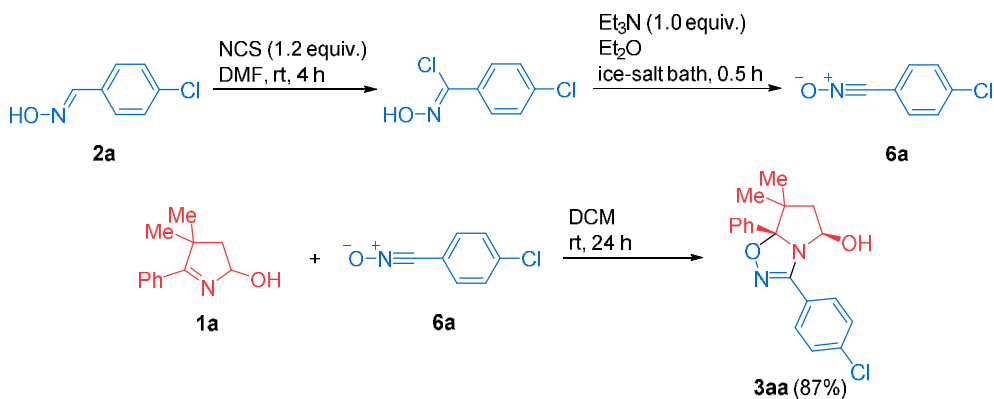

A 5-mL round-bottom flask with a stir bar was charged with aldoxime **2a** (155 mg, 1.0 mmol) and DMF (3 mL). Then N-chlorosuccinimide (160 mg, 1.2 mmol) was added, the reaction flask was capped with a glass stopper, and the reaction mixture was stirred at room temperature for 4 h. After the completion of the reaction, the mixture was diluted with water (10 mL), and the water layer was extracted with diethyl ether (3 × 10 mL). The organic layers were combined, washed with water (3 × 10 mL) and dried over CaCl<sub>2</sub>.

The residue after solvent evaporation without additional purification, 4-chloro-N-hydroxybenzimidoyl chloride (170 mg, 0.9 mmol), was placed in a 25-mL round-bottom flask with a stir bar immersed in an ice-salt bath. Then diethyl ether (10 mL) and triethylamine (91 mg, 0.9 mmol) were sequentially added, and the obtained reaction mixture was stirred for 0.5 h. A white precipitate was filtered off and washed with diethyl ether (2 × 5 mL). Further evaporation of the mother solution under reduced pressure at room temperature afforded nitrile oxide **6a** (132 mg) as an oily solid with acceptable purity.

Thus pre-synthesized nitrile oxide **6a** was dissolved in DCM (3 mL), and pyrroline **1a** (47 mg, 0.25 mmol) was added. The reaction mixture was stirred at room temperature for 24 h. After reaction completion the solvent was evaporated. The residue was analyzed by <sup>1</sup>H NMR using durene as an internal standard to reveal the formation of fused 1,2,4-oxadiazoline **3aa** in 87% yield with total diastereoselectivity.

## Reaction of pyrroline 1a with aldoxime 2a in the absence of oxidant

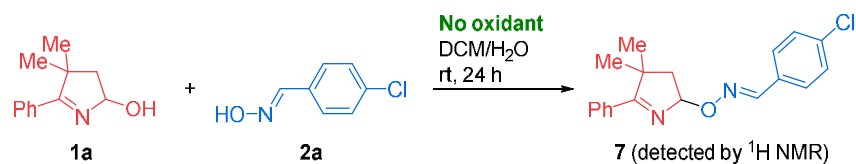

Characteristic signals of product 7: <sup>1</sup>H NMR (400.1 MHz, CDCl<sub>3</sub>):  $\delta$  = 8.15 (s, 1H), 7.84-7.82 (m, 2H), 7.57 (d,  $J$  = 8.5 Hz, 2H), 7.46-7.40 (m, 3H), 7.32 (d,  $J$  = 8.5 Hz, 2H), 6.24 (t,  $J$  = 6.5 Hz, 1H), 2.38 (dd,  $J$  = 13.2 Hz,  $J$  = 6.6 Hz, 1H), 2.09 (dd,  $J$  = 13.2 Hz,  $J$  = 6.5 Hz, 1H), 1.47 (s, 3H), 1.45 (s, 3H).

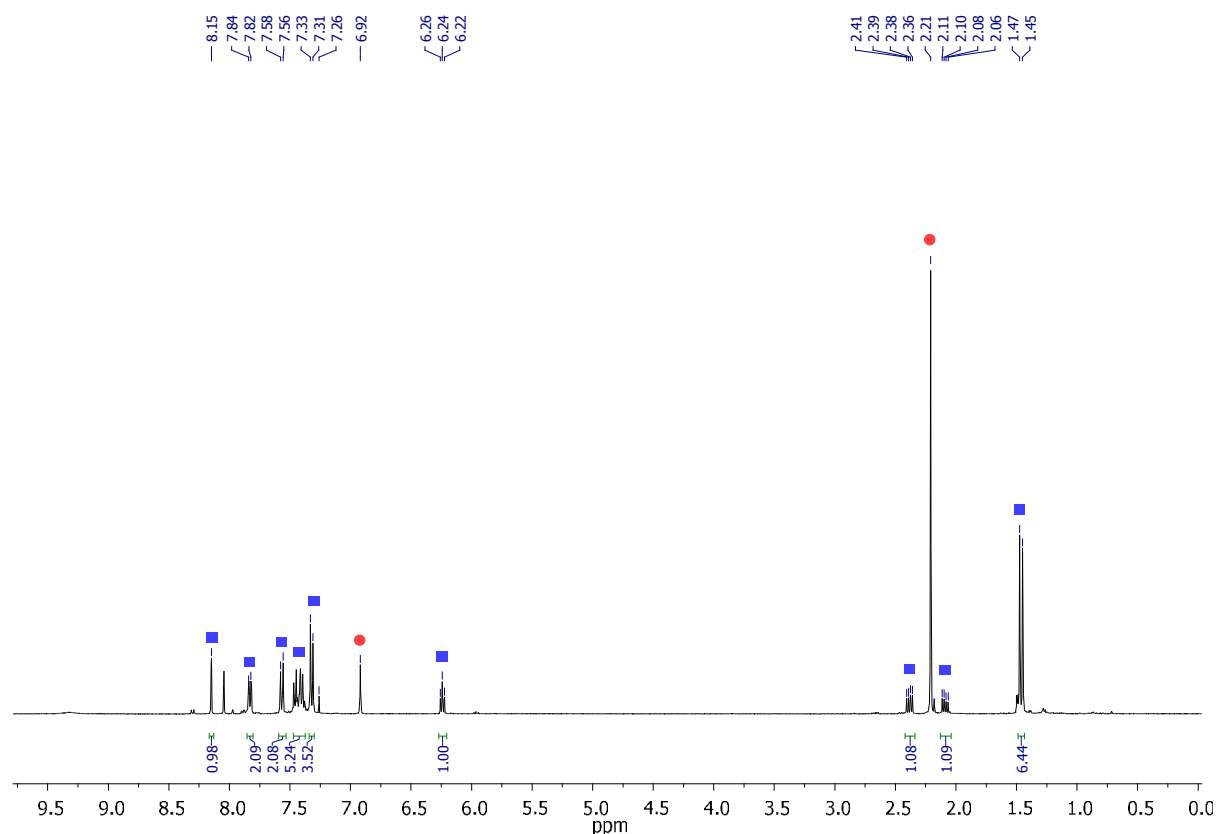

<sup>1</sup>H NMR Spectrum of crude (400.1 MHz, CDCl<sub>3</sub>). Characteristic signals of product 7 (blue squares) and signals of internal standard (durene, red circles) are represented.

## X-Ray diffraction analysis for **3aa**

The determination of the unit cell and the data collection for (*5R*\*,*7aS*\*)-3-(4-chlorophenyl)-7,7-dimethyl-7a-phenyl-5,6,7,7a-tetrahydropyrrolo[1,2-d][1,2,4]oxadiazol-5-ol (**3aa**) was performed on a Bruker D8 VENTURE PHOTON 100 CMOS diffractometer with MoK $\alpha$  radiation ( $\lambda = 0.71073$ ) at 293.0(2) K using the  $\omega$ - $\phi$  scan technique. A specimen of **3aa** (C<sub>19</sub>H<sub>19</sub>ClN<sub>2</sub>O<sub>2</sub>), approximate dimensions 0.05 mm x 0.15 mm x 0.39 mm, was used for the X-ray crystallographic analysis. The X-ray intensity data were measured. The integration of the data using a monoclinic unit cell with *P*2<sub>1</sub>/*c* space group yielded a total of 72219 reflections to a maximum  $\theta$  angle of 26.1° (0.81 Å resolution), of which 7036 were independent (completeness = 100.0%, R<sub>int</sub> = 12.68%, R<sub>sig</sub> = 5.95%) and 3969 were greater than 2 $\sigma$ (F<sub>2</sub>). The final cell constants of **a** = 9.286(6) Å, **b** = 21.161(16) Å, **c** = 18.146(13) Å, Z = 4, volume = 3566(4) Å<sup>3</sup>. Data were corrected for absorption effects using the multi-scan method (SADABS).<sup>1</sup> The calculated minimum and maximum transmission coefficients (based on crystal size) are 0.961 and 0.988. The structure was solved using the Bruker SHELXTL Software Package<sup>2</sup> and refined using Olex2 package.<sup>3</sup> All H atoms were treated by mixed method.

The final anisotropic full-matrix least-squares refinement on F<sub>2</sub> with 444 variables converged at R<sub>1</sub> = 5.00%, for the observed data and wR<sub>2</sub> = 11.72% for all data. The goodness-of-fit was 1.02. The largest peak in the final difference electron density synthesis was 0.23 e-/Å<sup>3</sup> and the largest hole was -0.30 e-/Å<sup>3</sup>. On the basis of the final model, the calculated density was 1.277 g/cm<sup>3</sup> and F(000), 1440 e-.

Atomic coordinates, bond lengths, bond angles and thermal parameters have been deposited at the Cambridge Crystallographic Data Centre (CCDC) and allocated the deposition numbers CCDC **2220955**. These data can be obtained free of charge from the Cambridge Crystallographic Data Centre via [www.ccdc.cam.ac.uk/data\\_request/cif](http://www.ccdc.cam.ac.uk/data_request/cif).

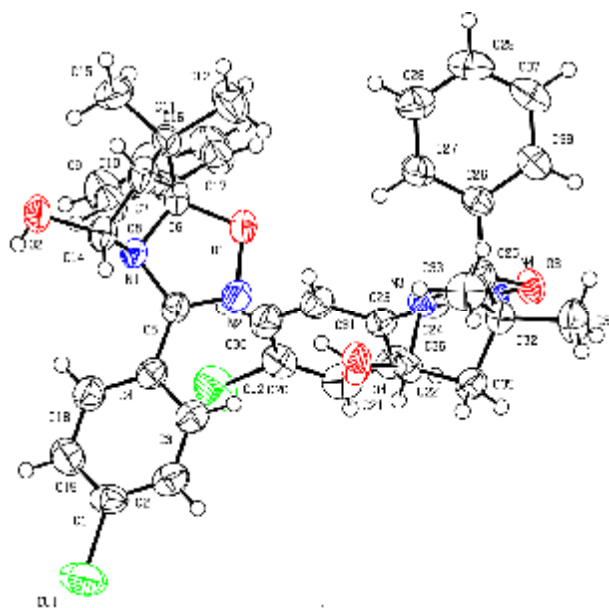

**Figure 1.** X-ray structure of (*5R*\*,*7aS*\*)-3-(4-chlorophenyl)-7,7-dimethyl-7a-phenyl-5,6,7,7a-tetrahydropyrrolo[1,2-d][1,2,4]oxadiazol-5-ol (**3aa**). Thermal ellipsoids set at 50% probability.

## References

1. G. M. Sheldrick, SADABS, Version 2008/1, 2008, Bruker AXS Inc., Germany.
2. G.M. Sheldrick, *Acta Crystallogr.*, 2008, **D64**, 112-122.
3. O. V. Dolomanov, L. J. Bourhis, R. J. Gildea, J. A. K. Howard, H. Puschmann, *J. Appl. Cryst.*, 2009, **42**, 339-341.

# $^1\text{H}$ and $^{13}\text{C}$ NMR Spectra of tetrahydropyrrolo[1,2-*d*]oxadiazoles **3**

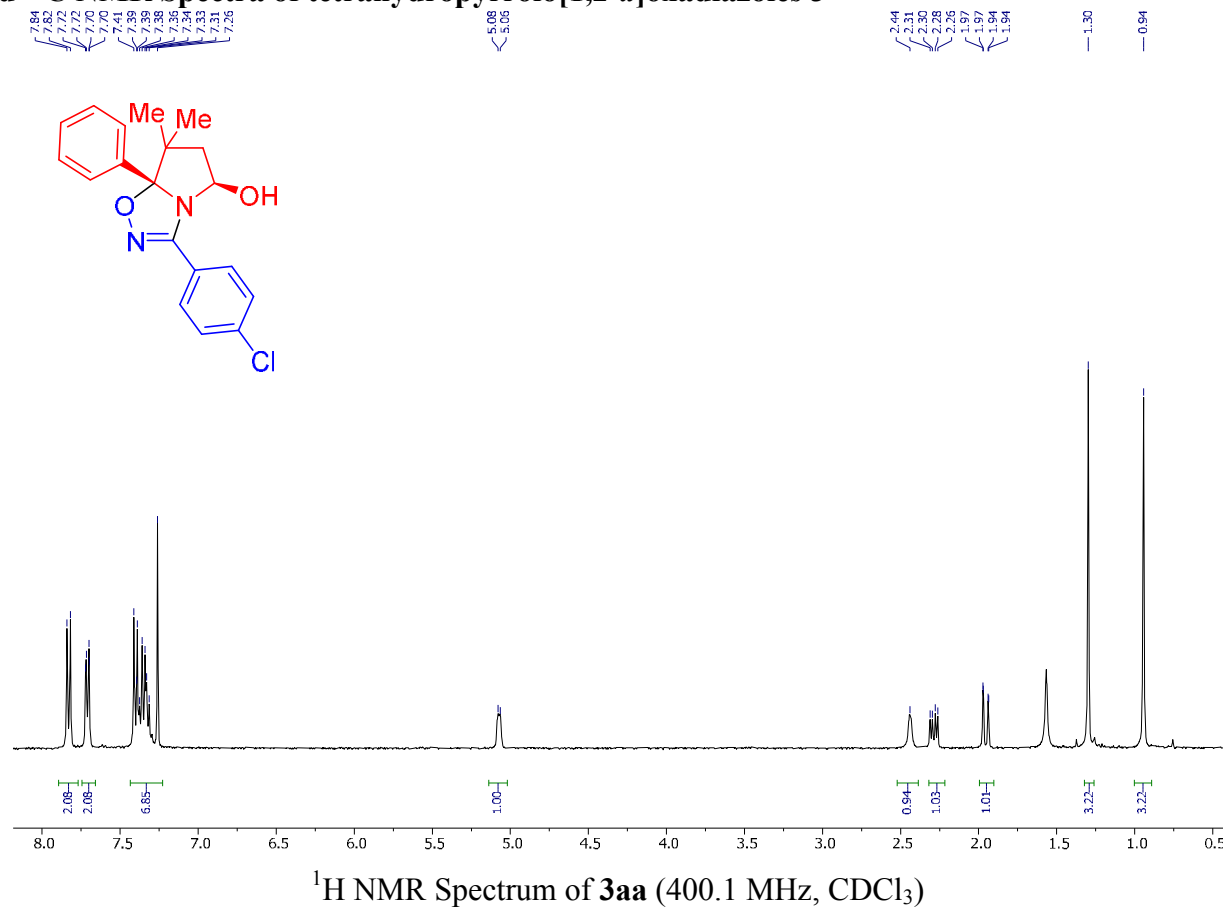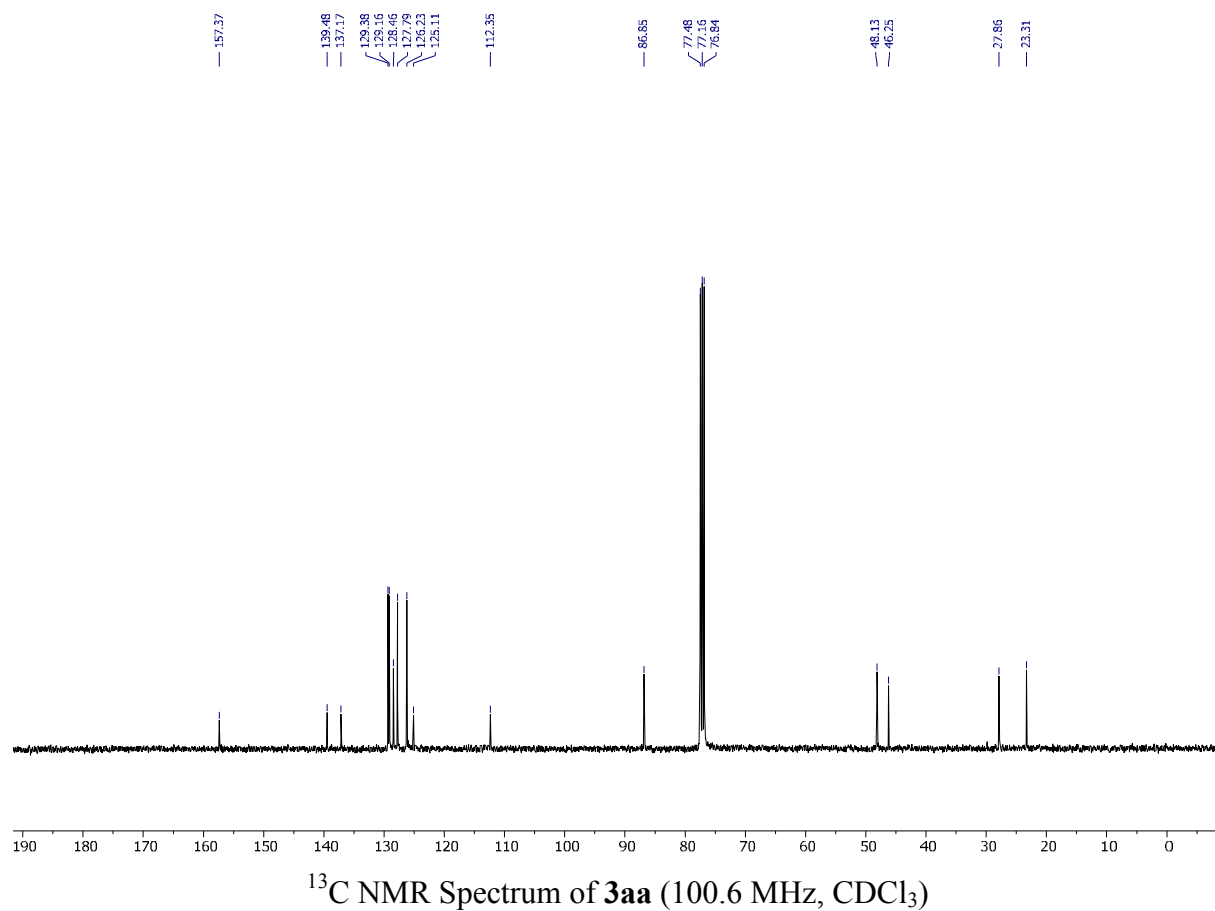

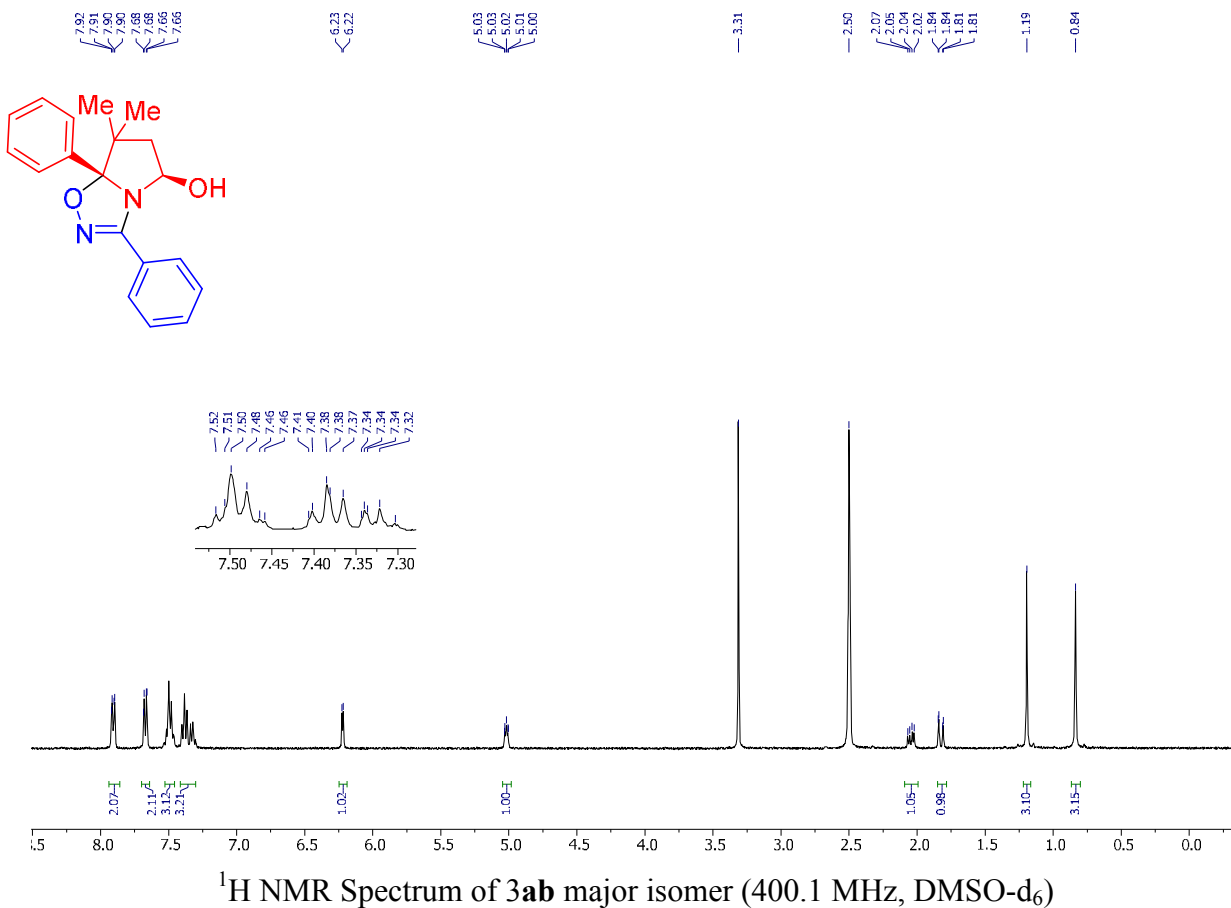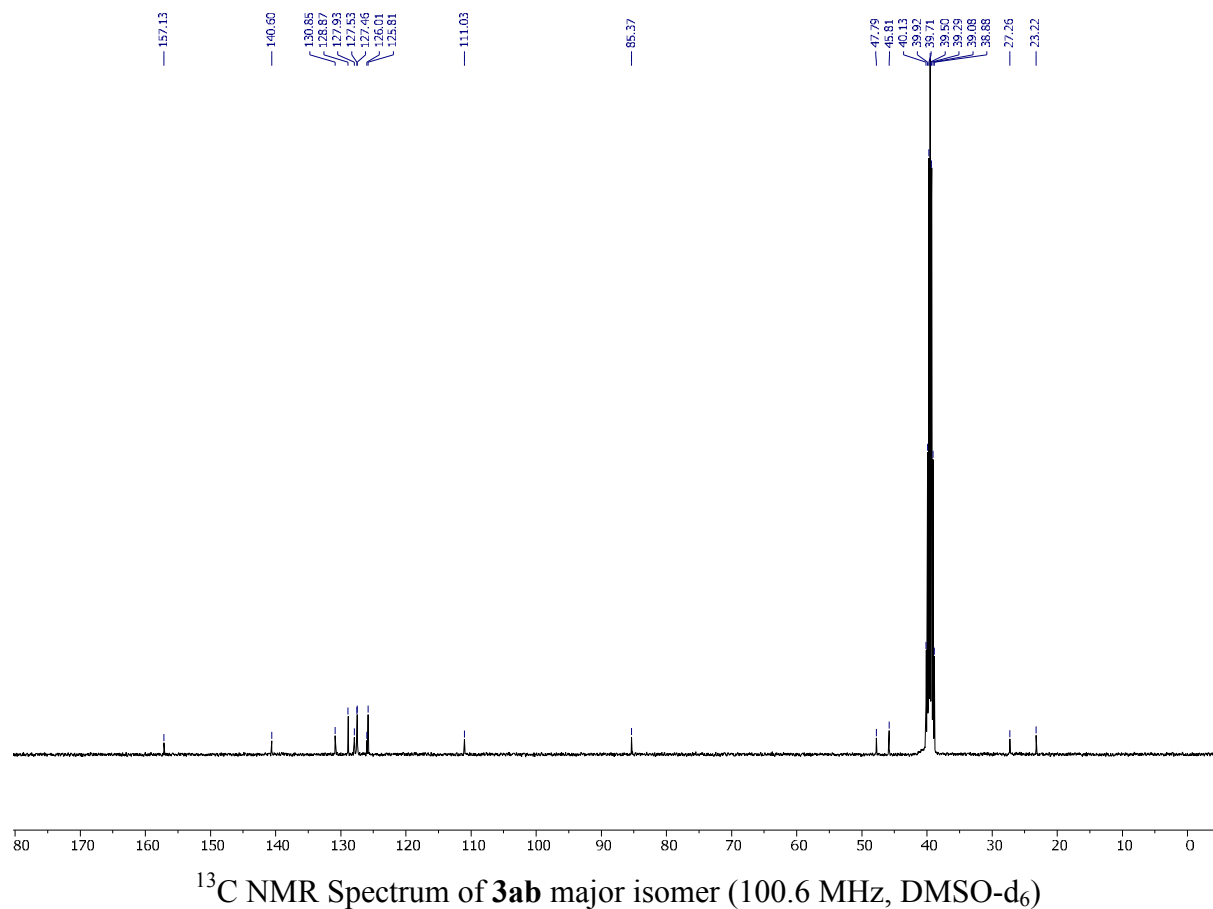

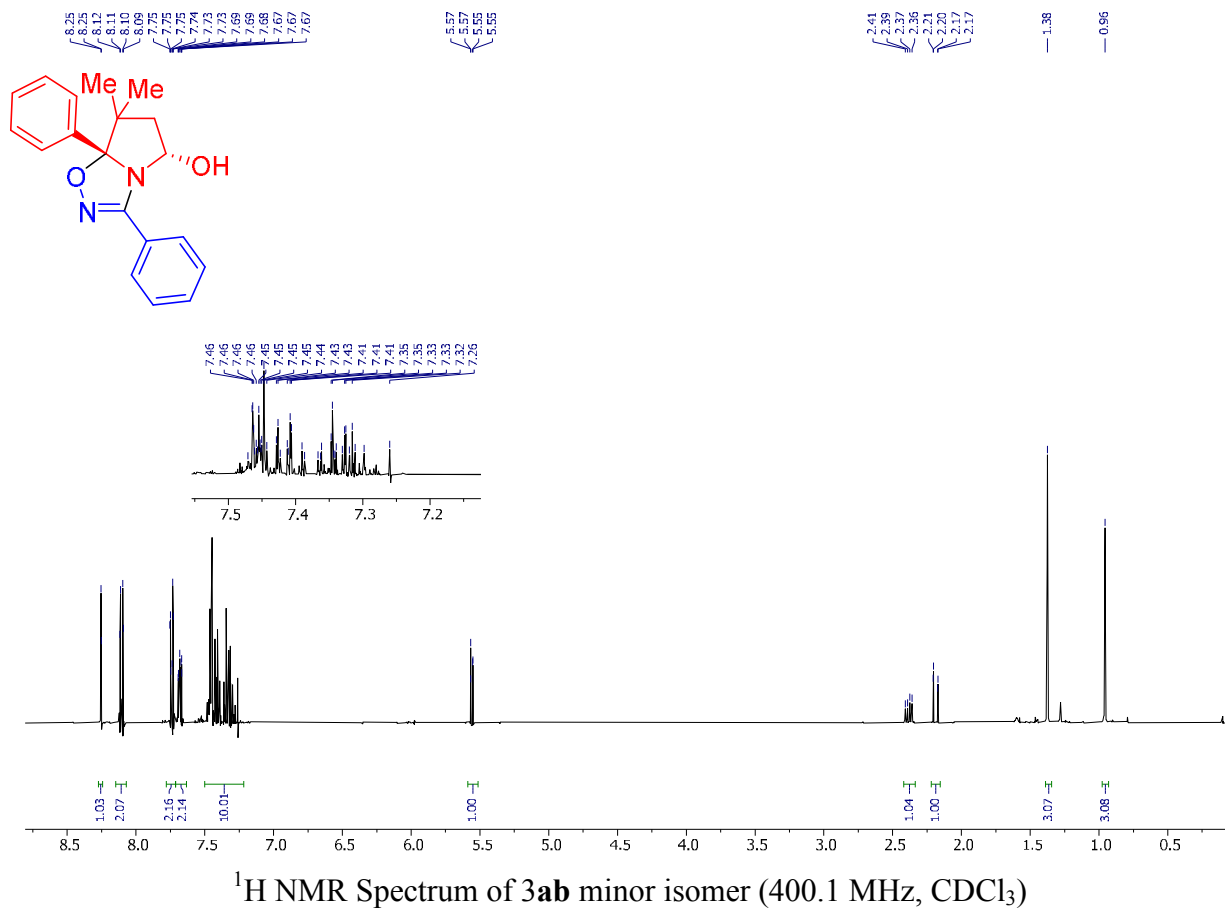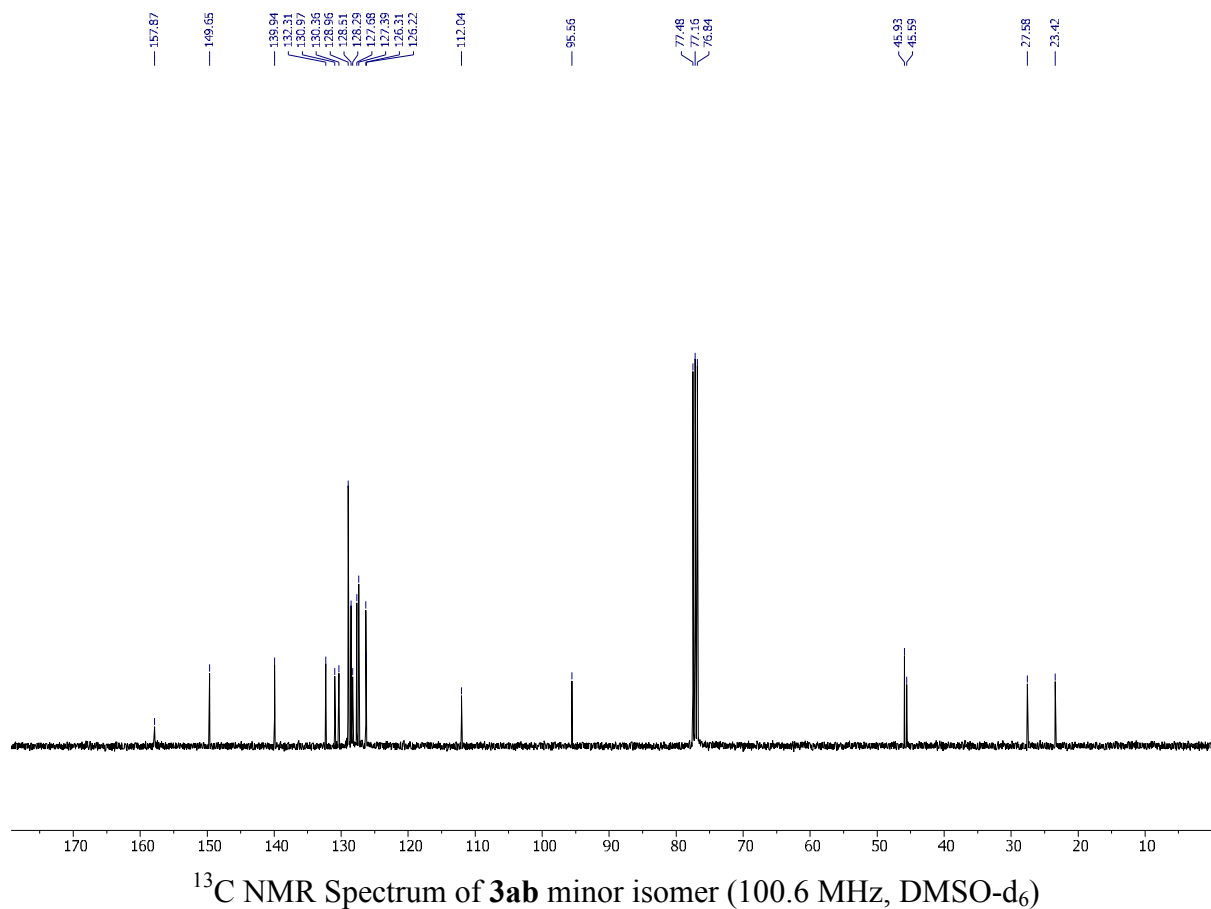



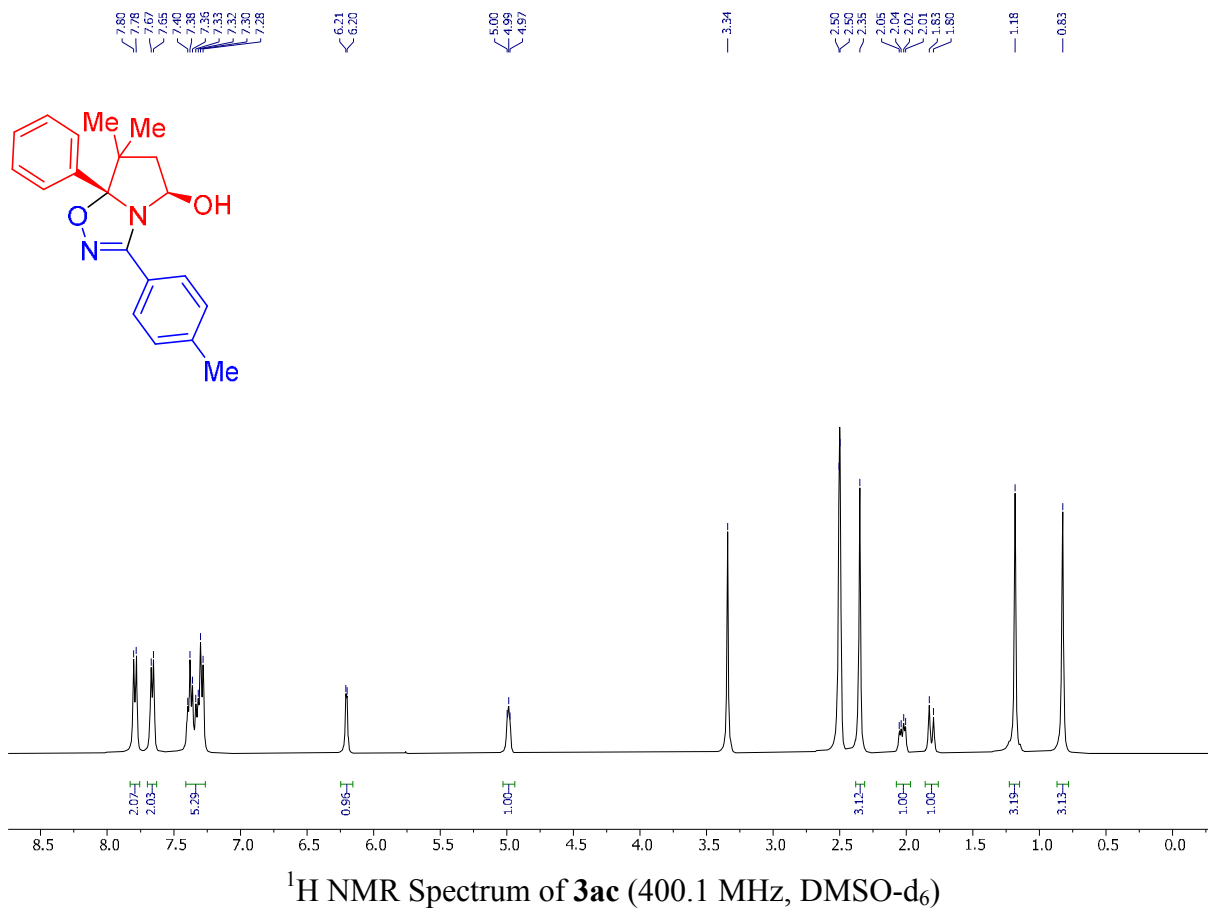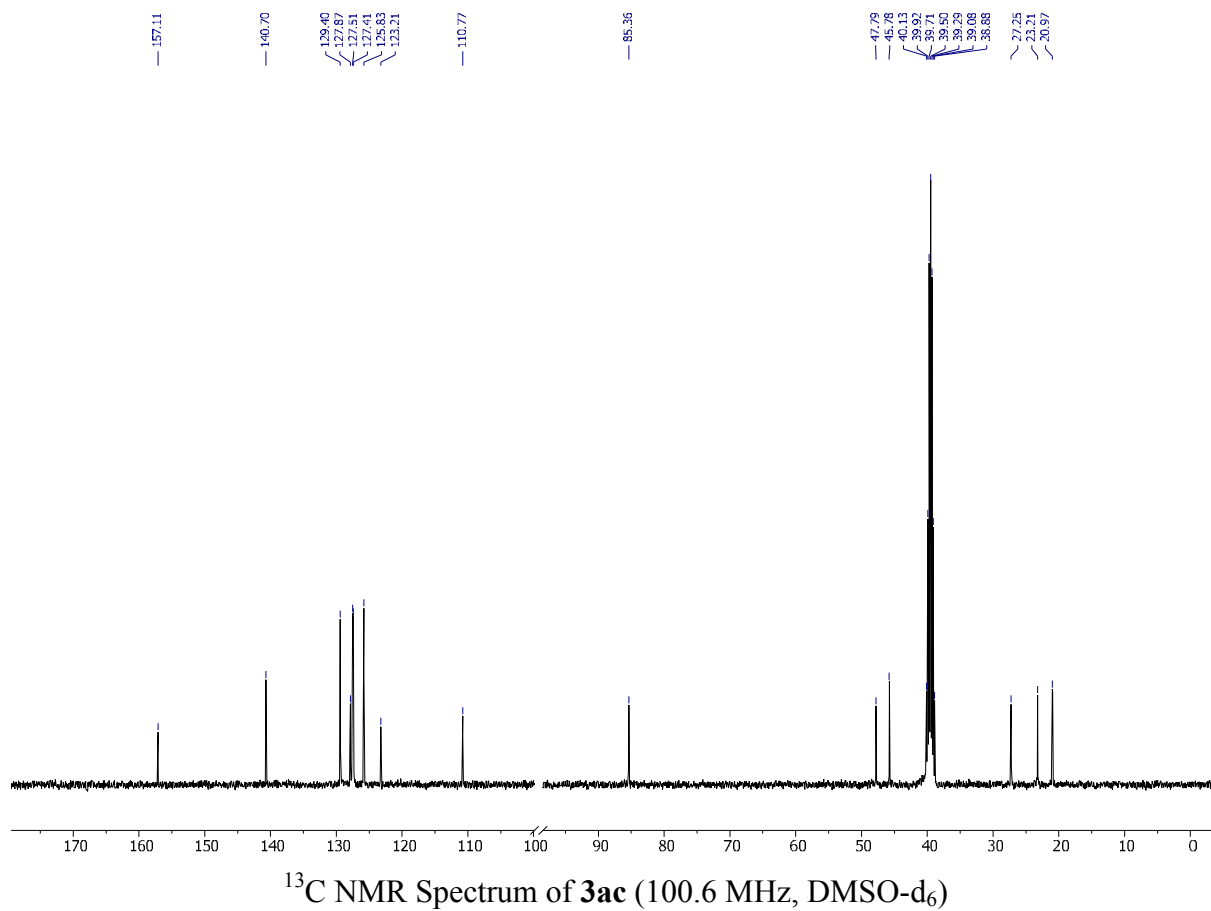

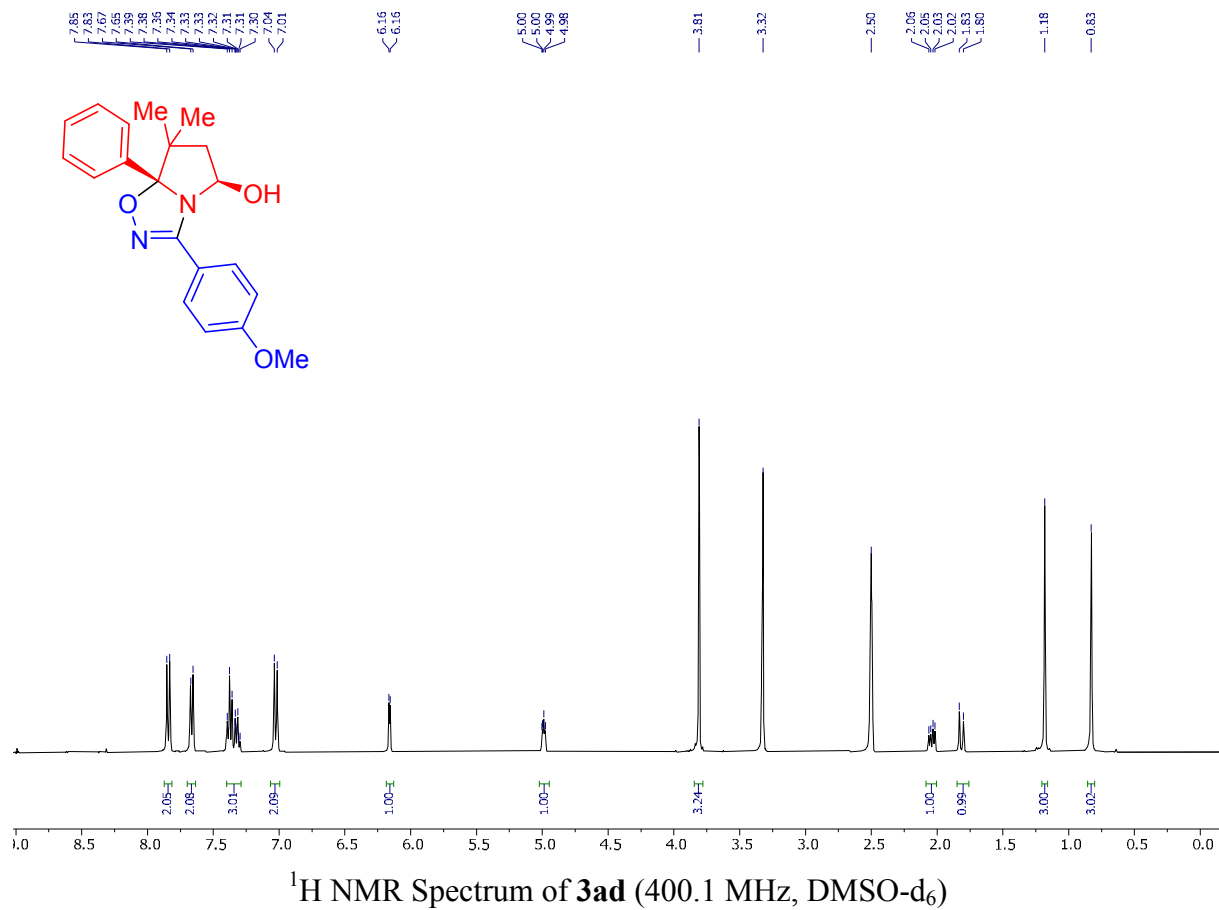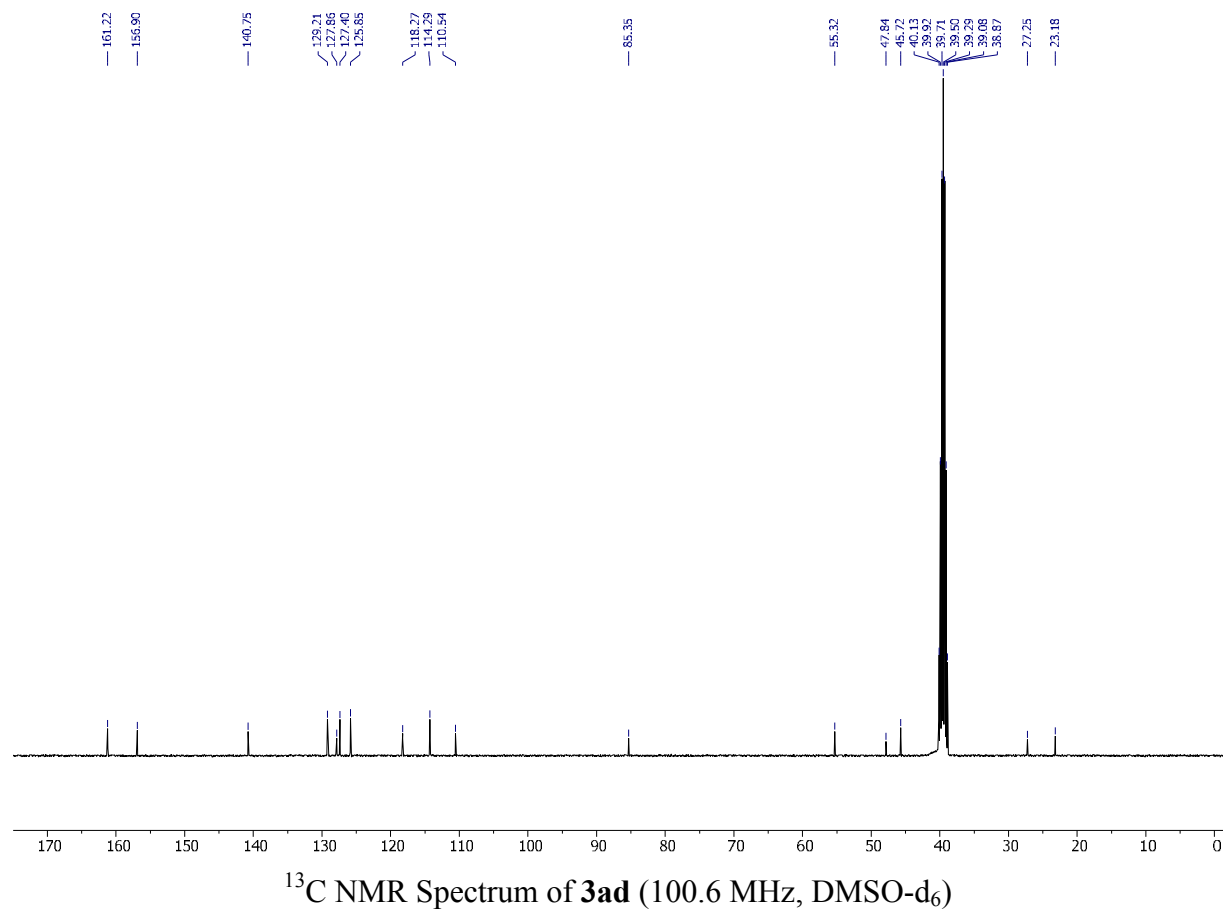

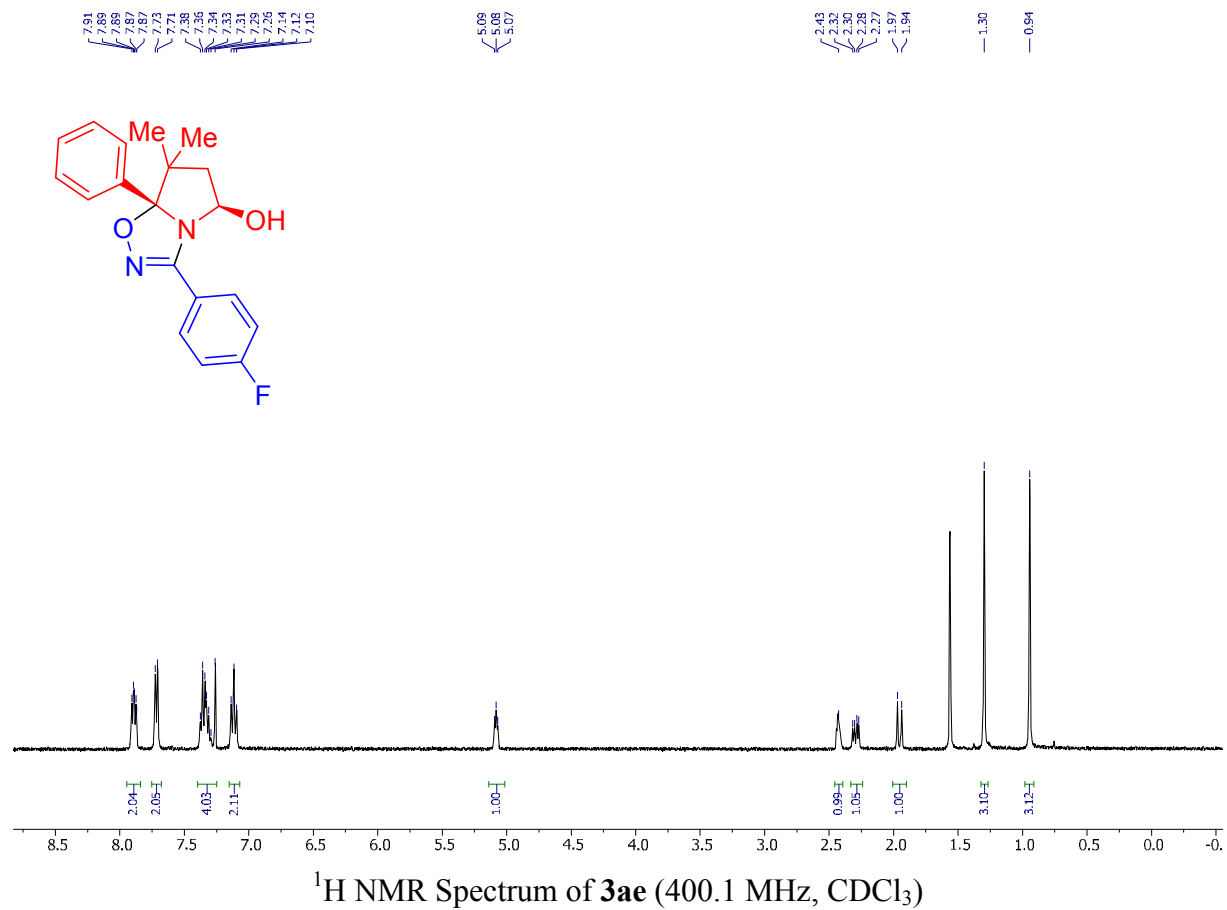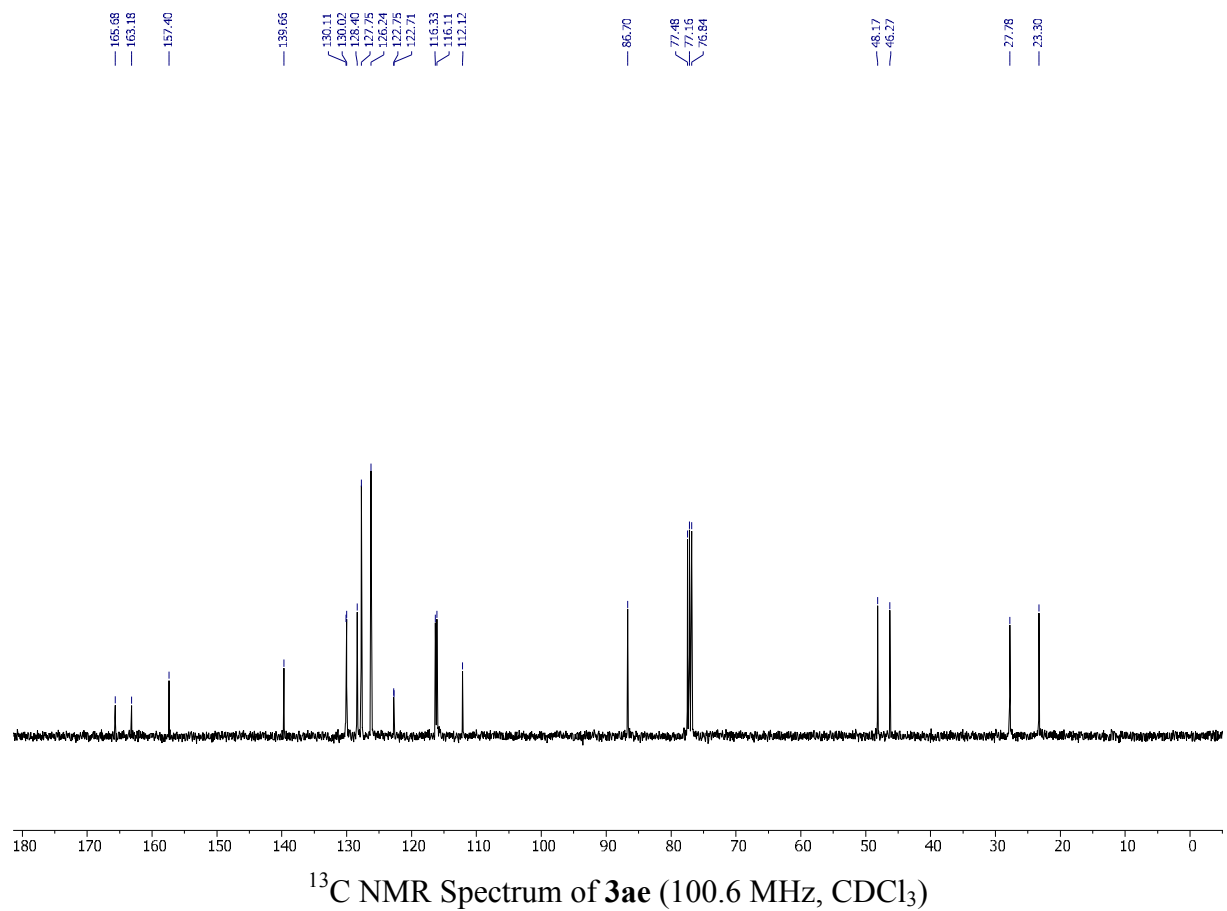

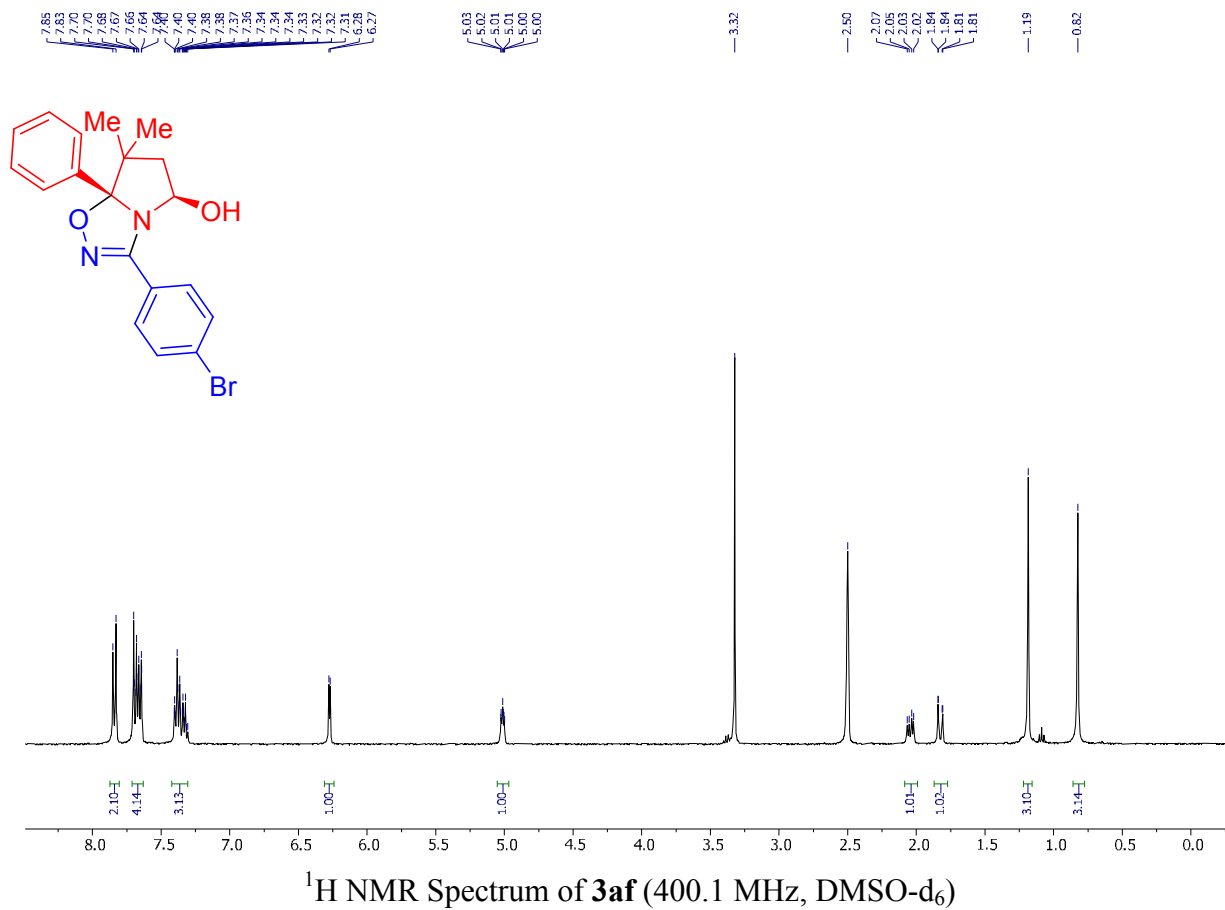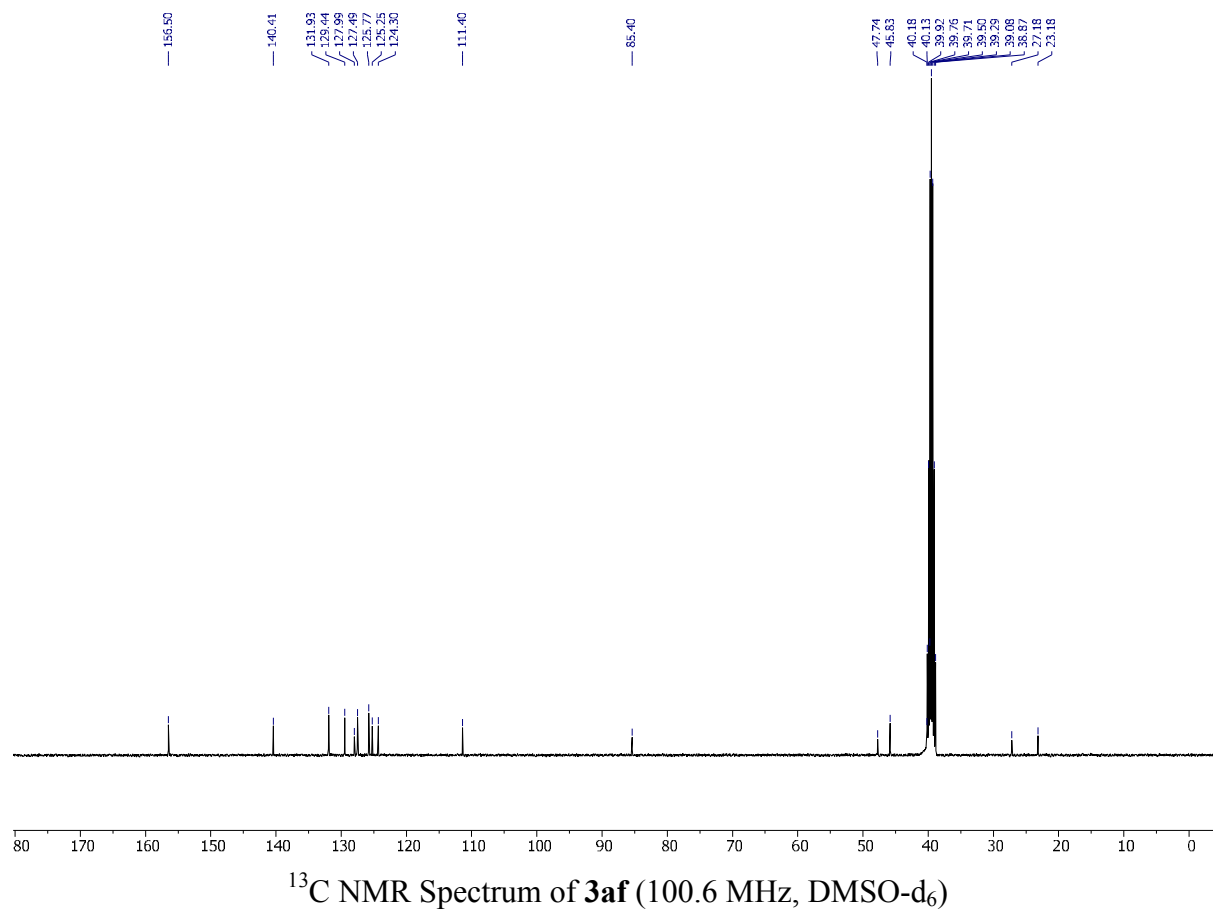

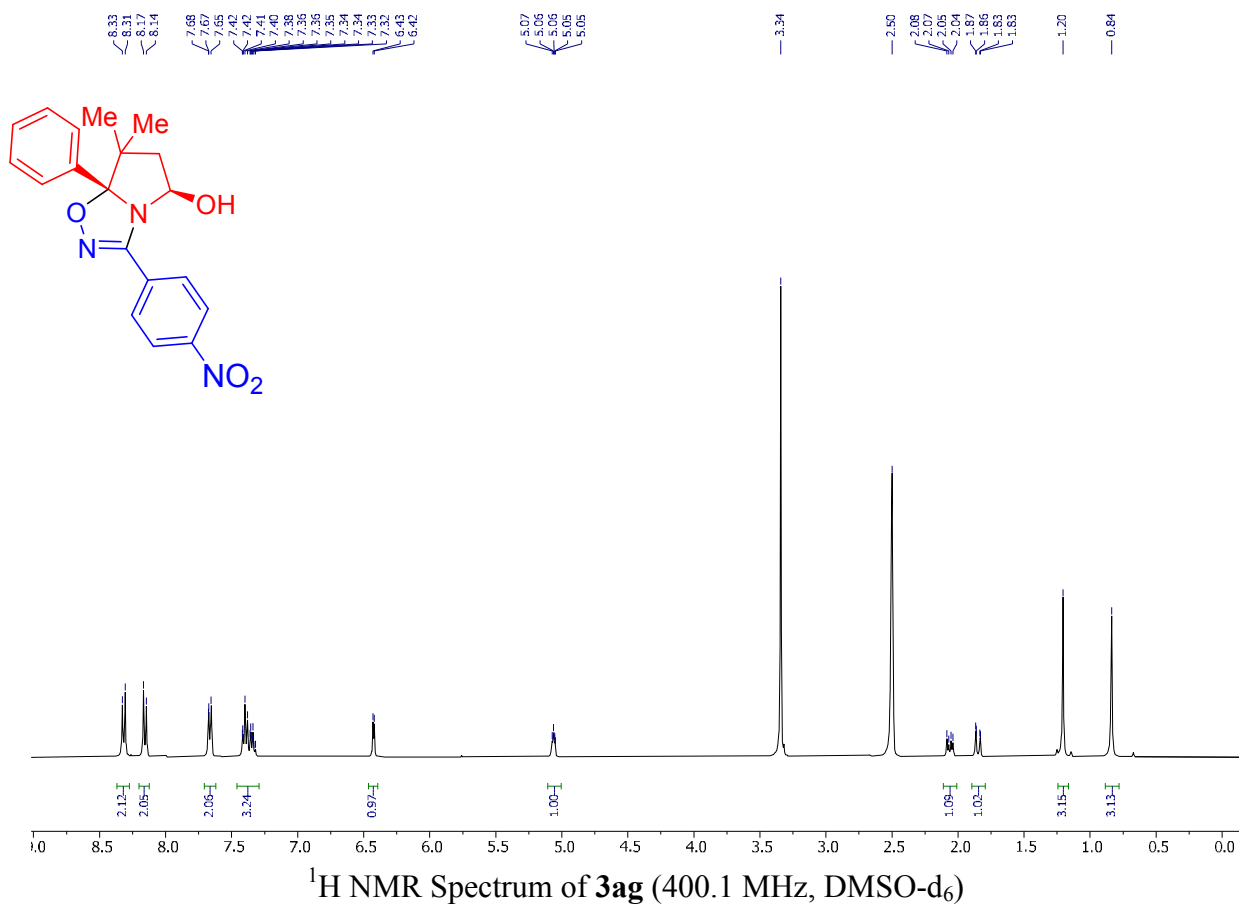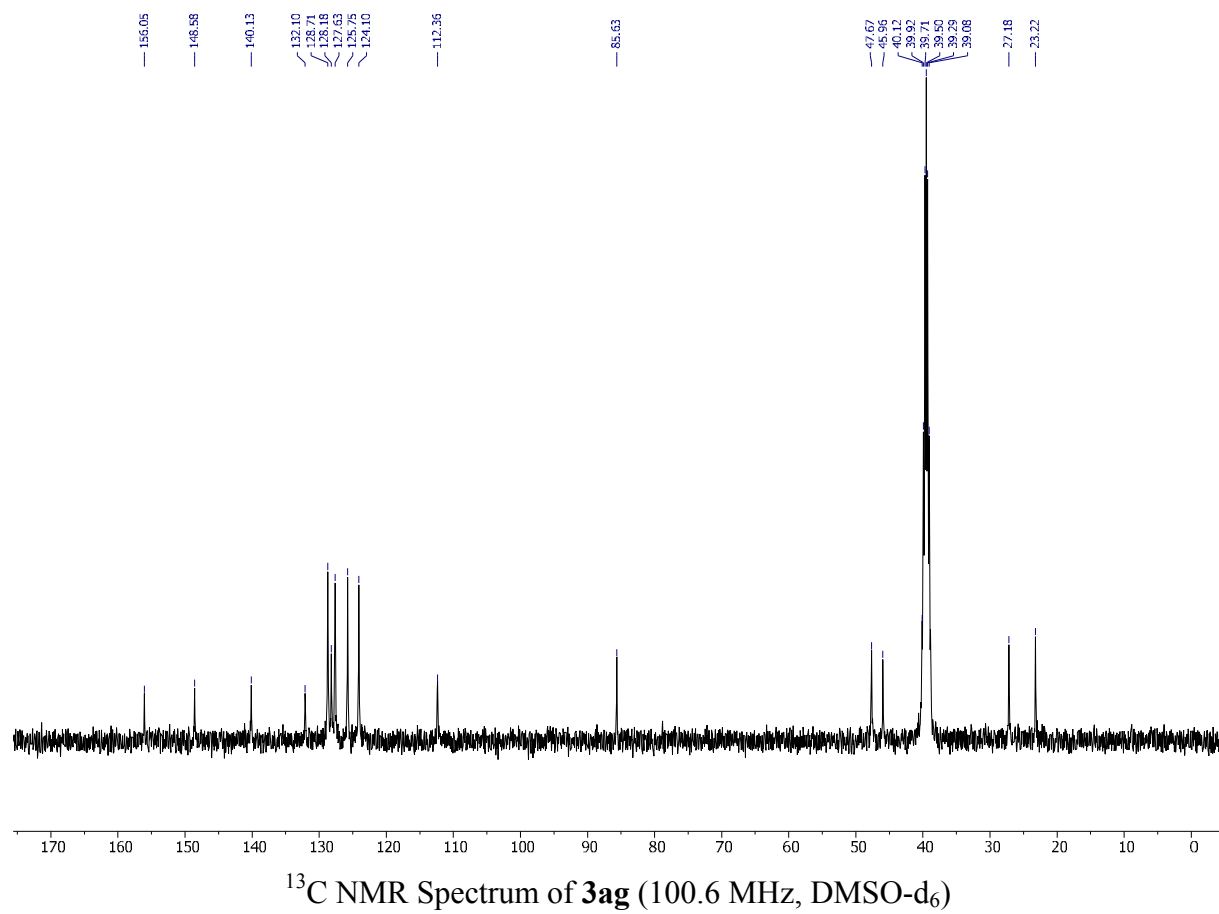

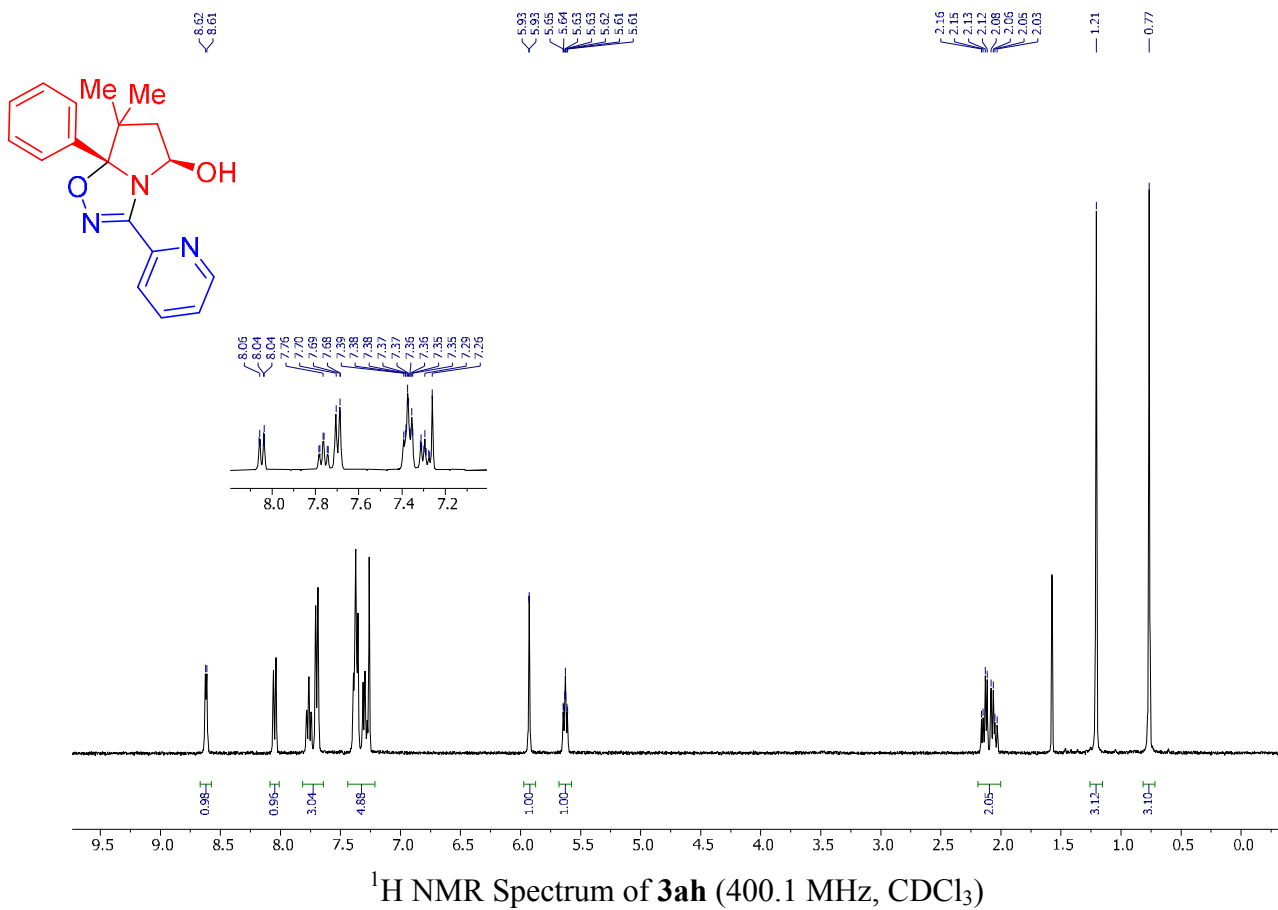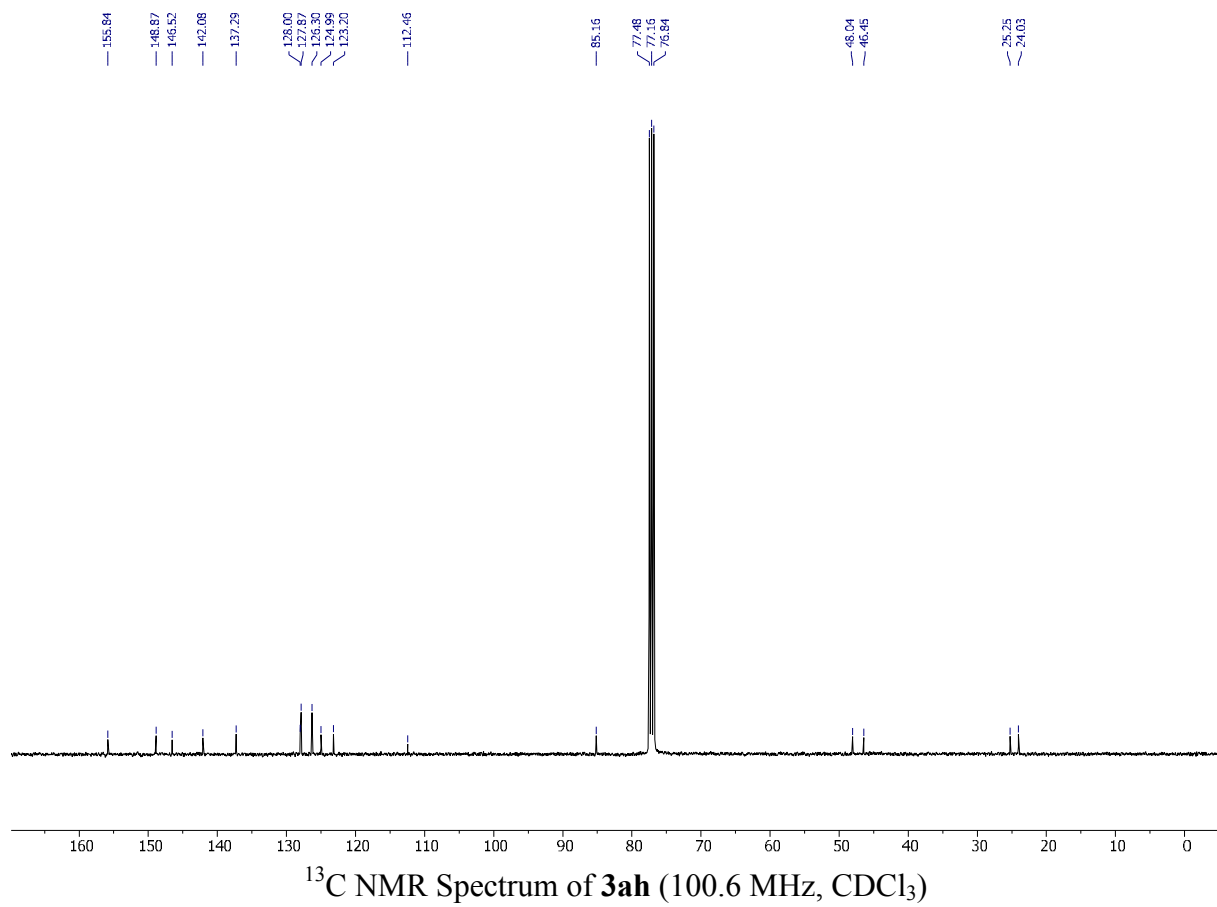

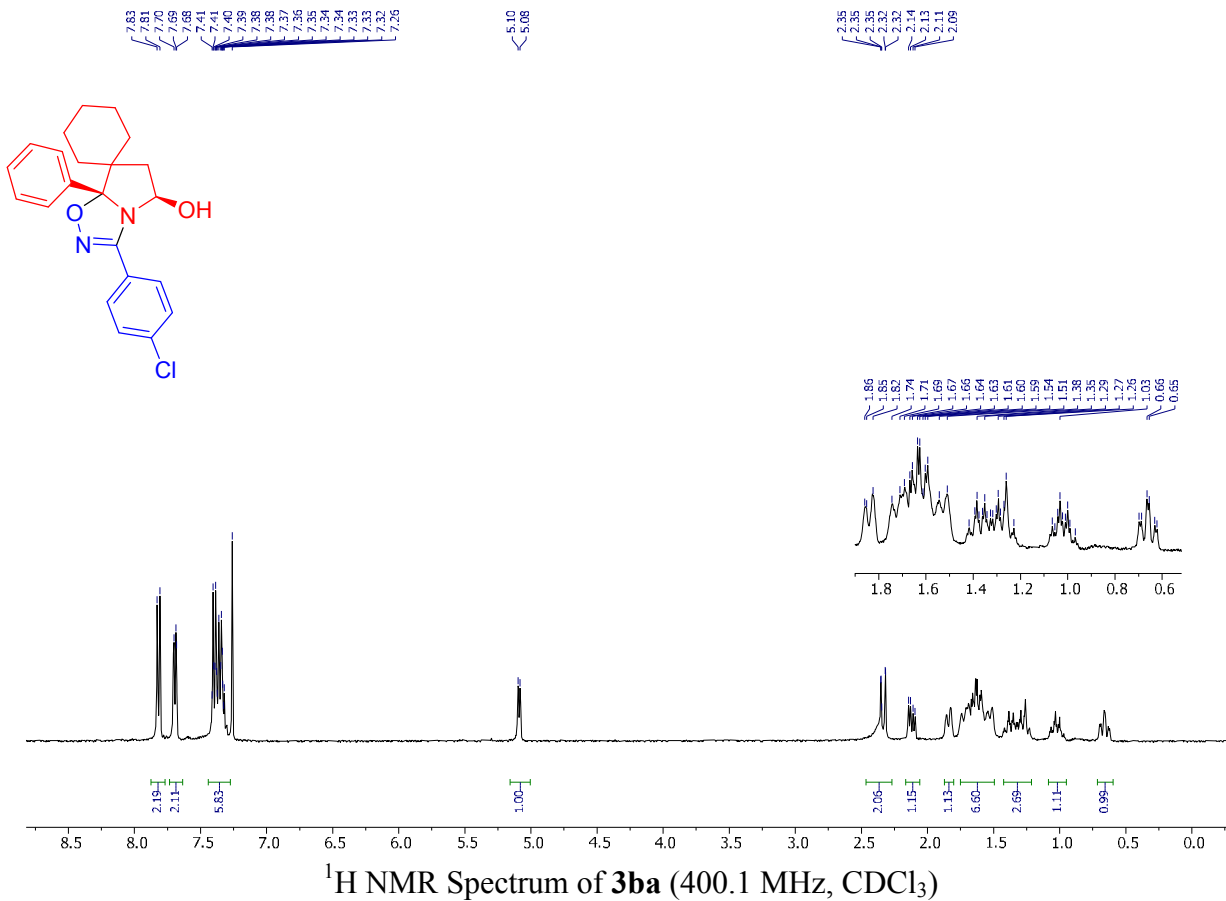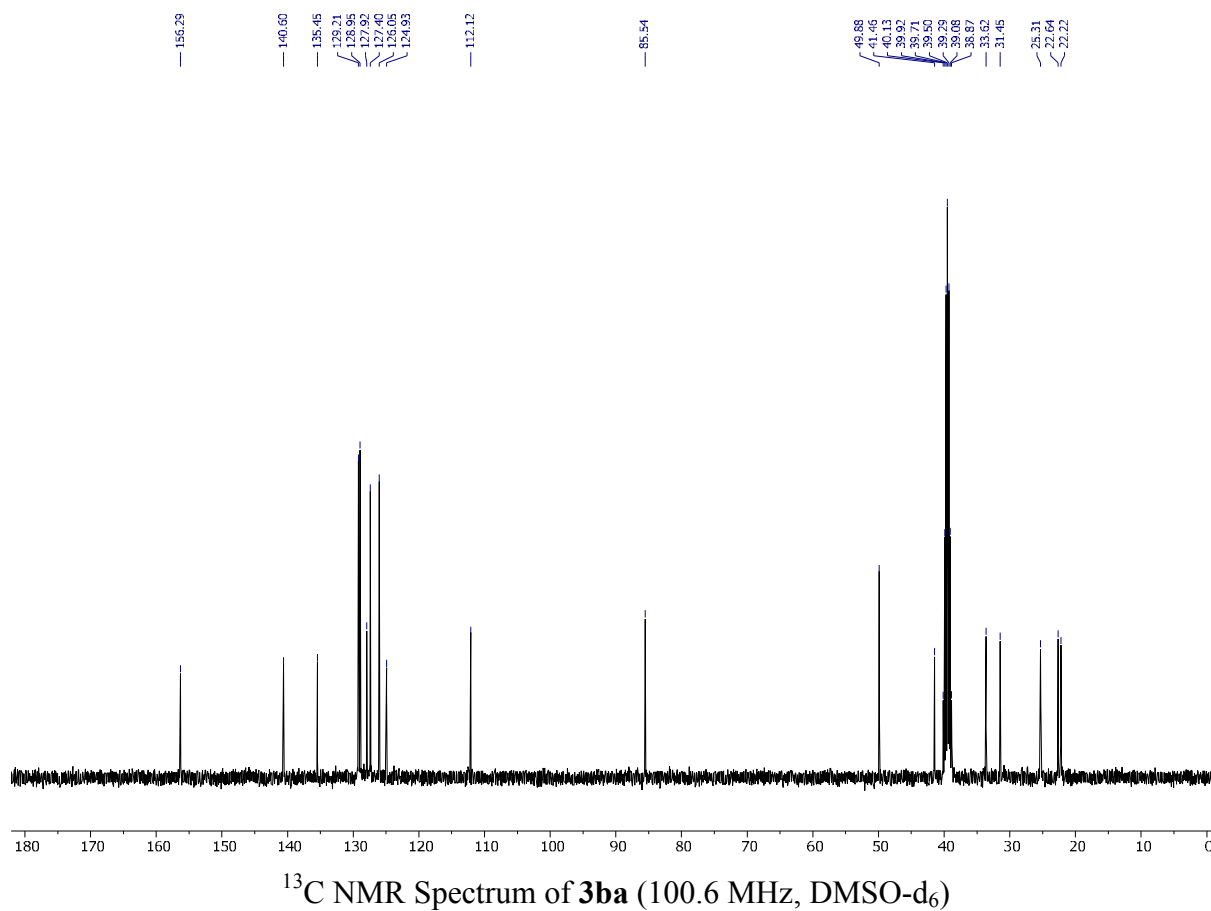

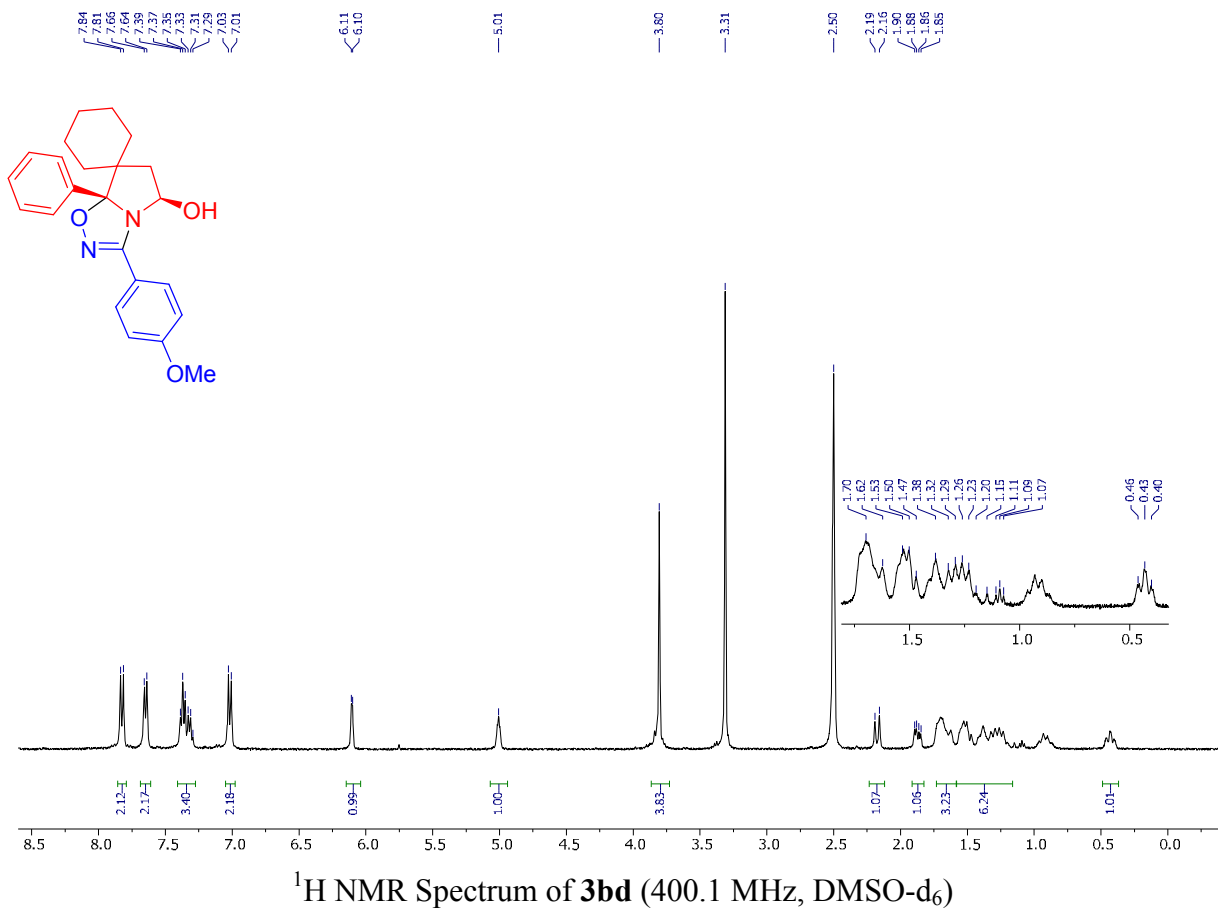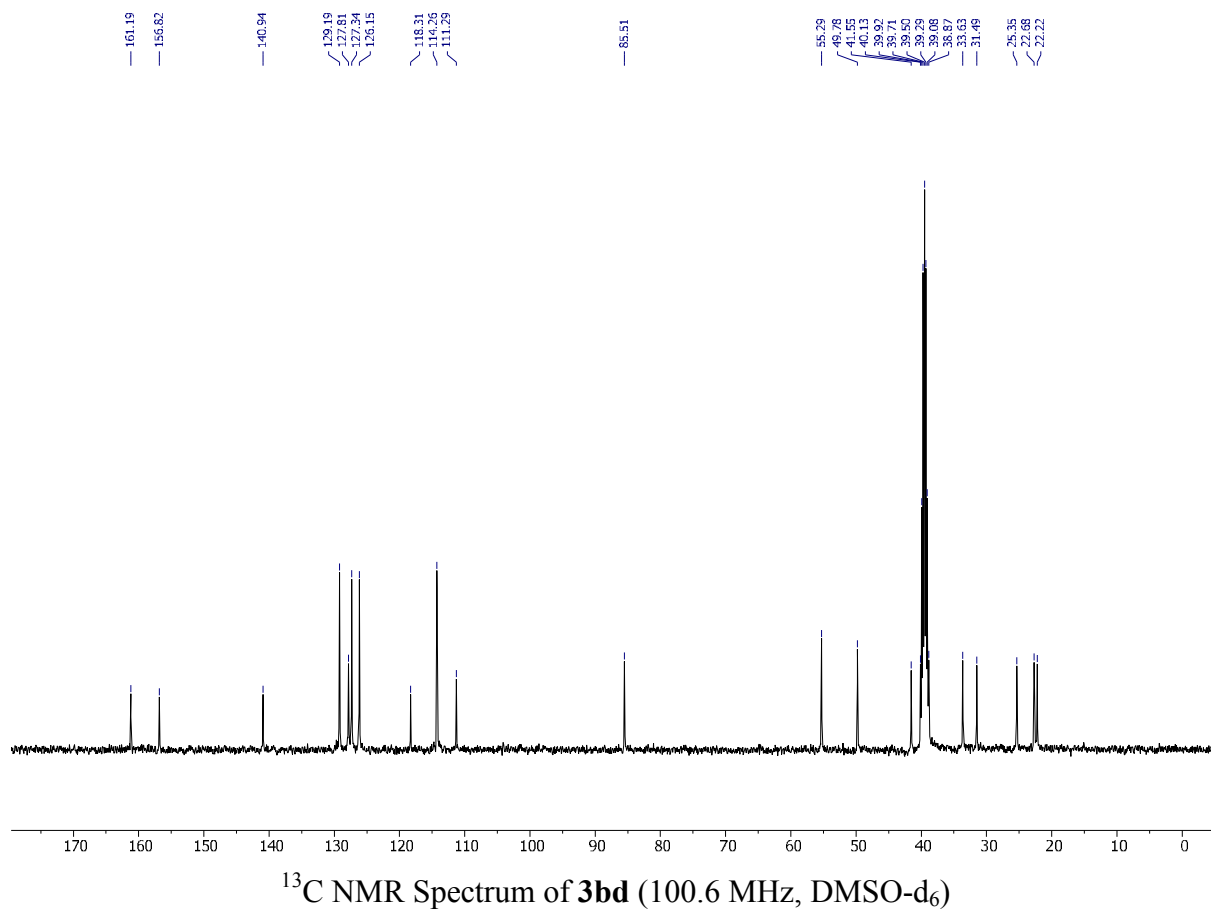



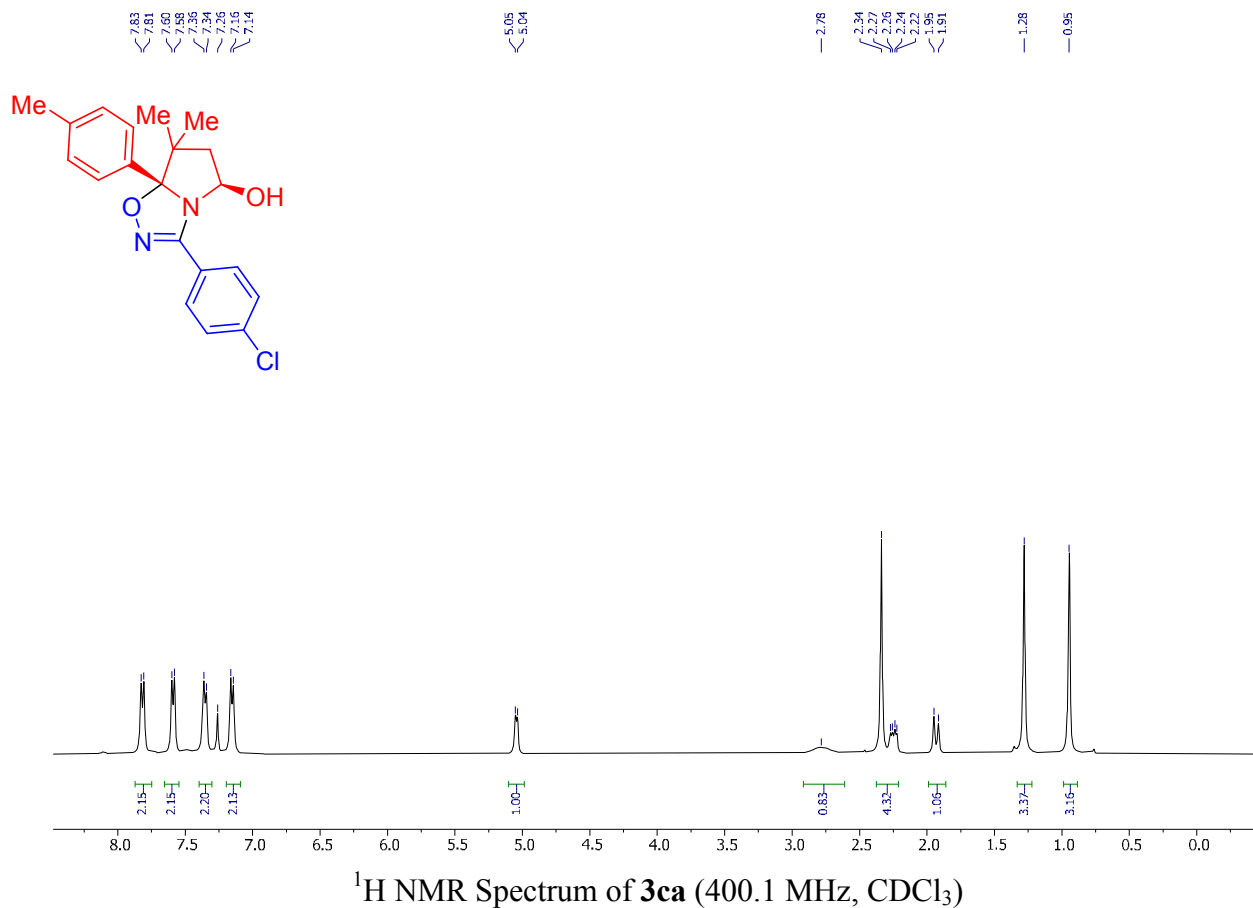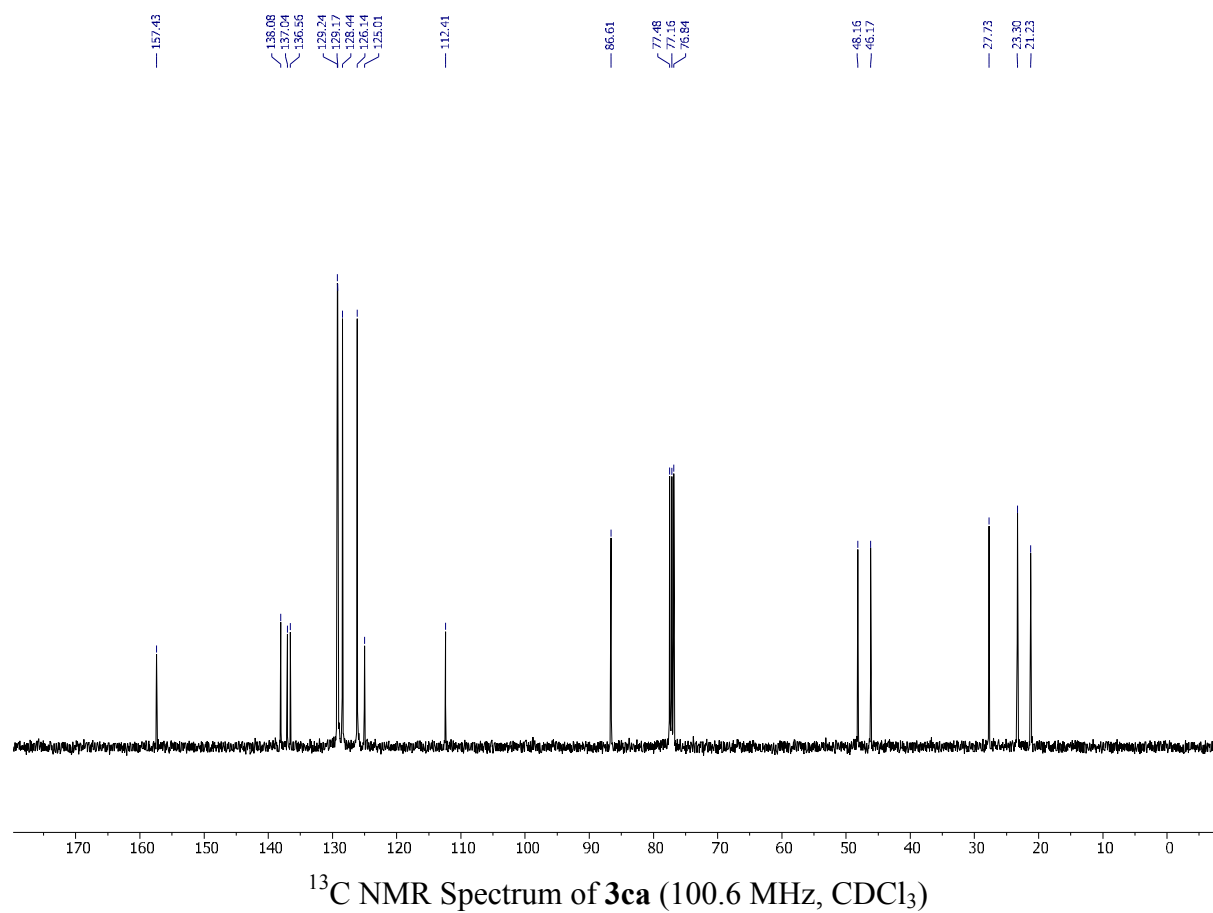

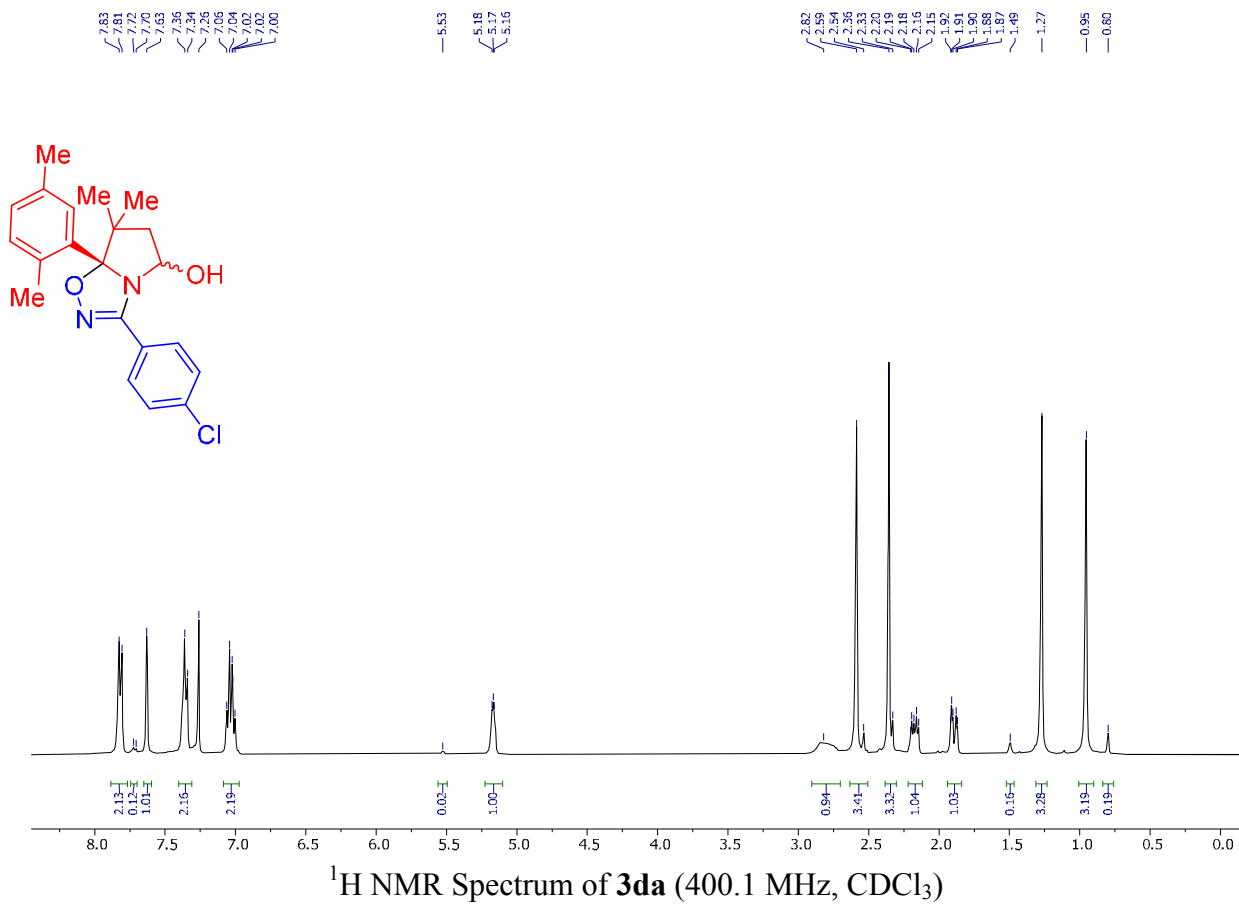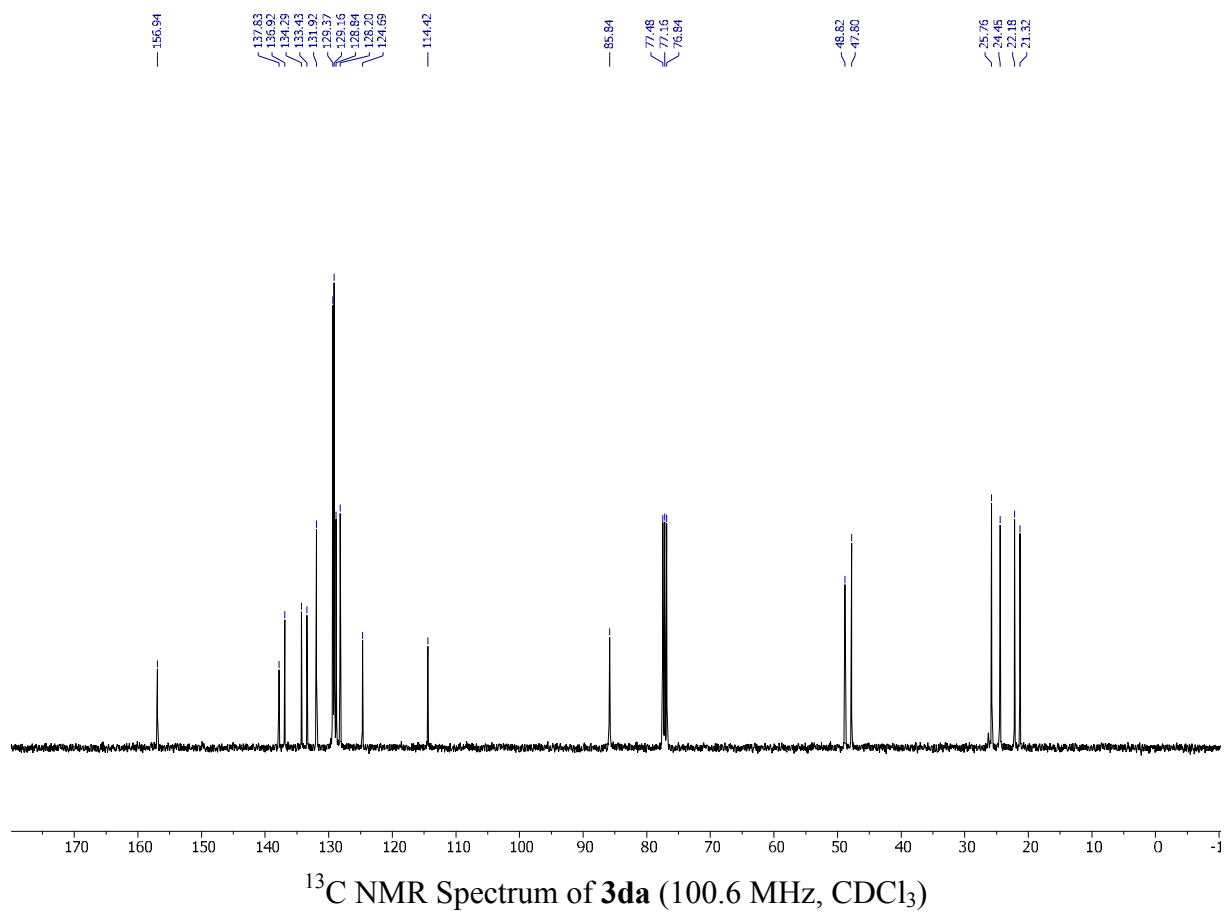

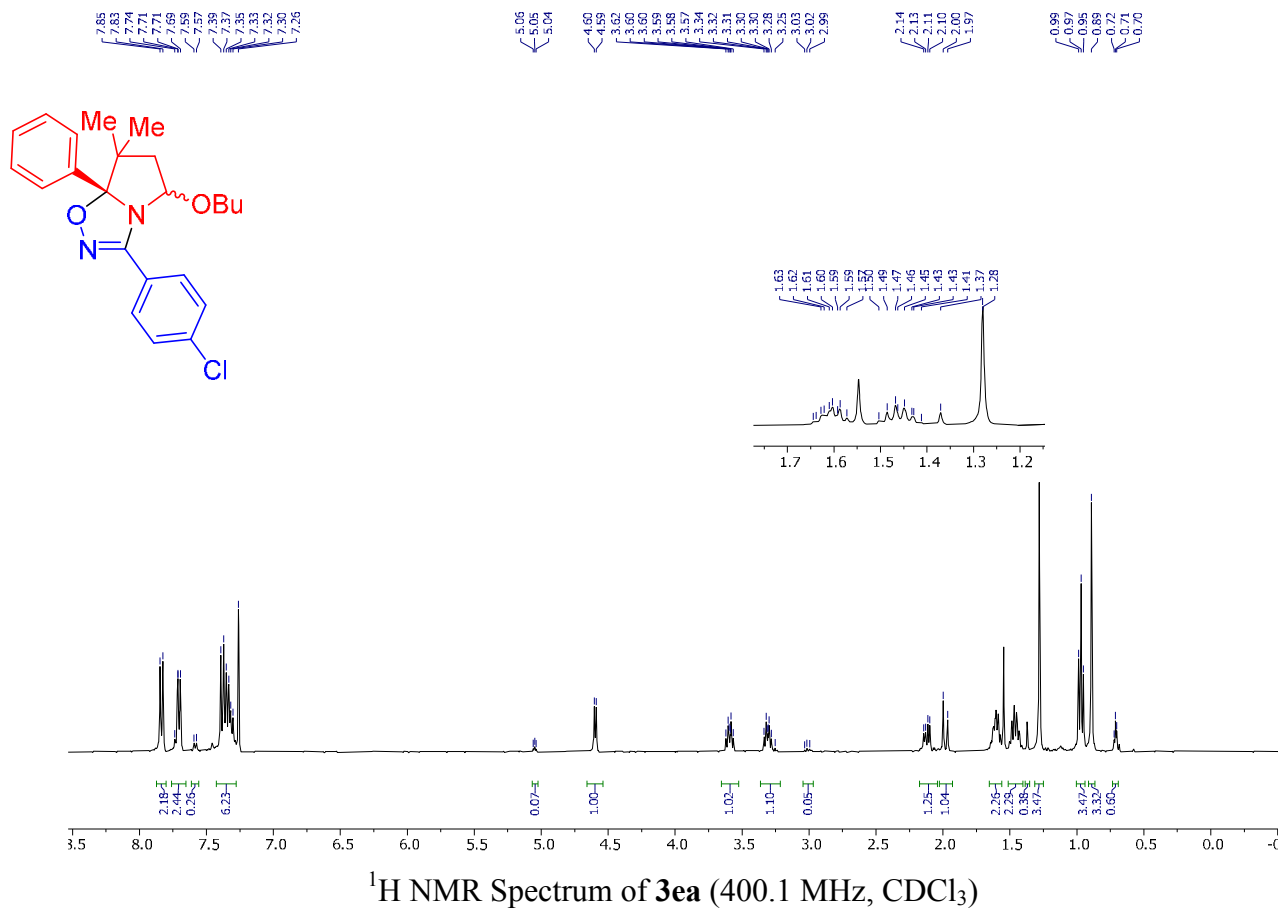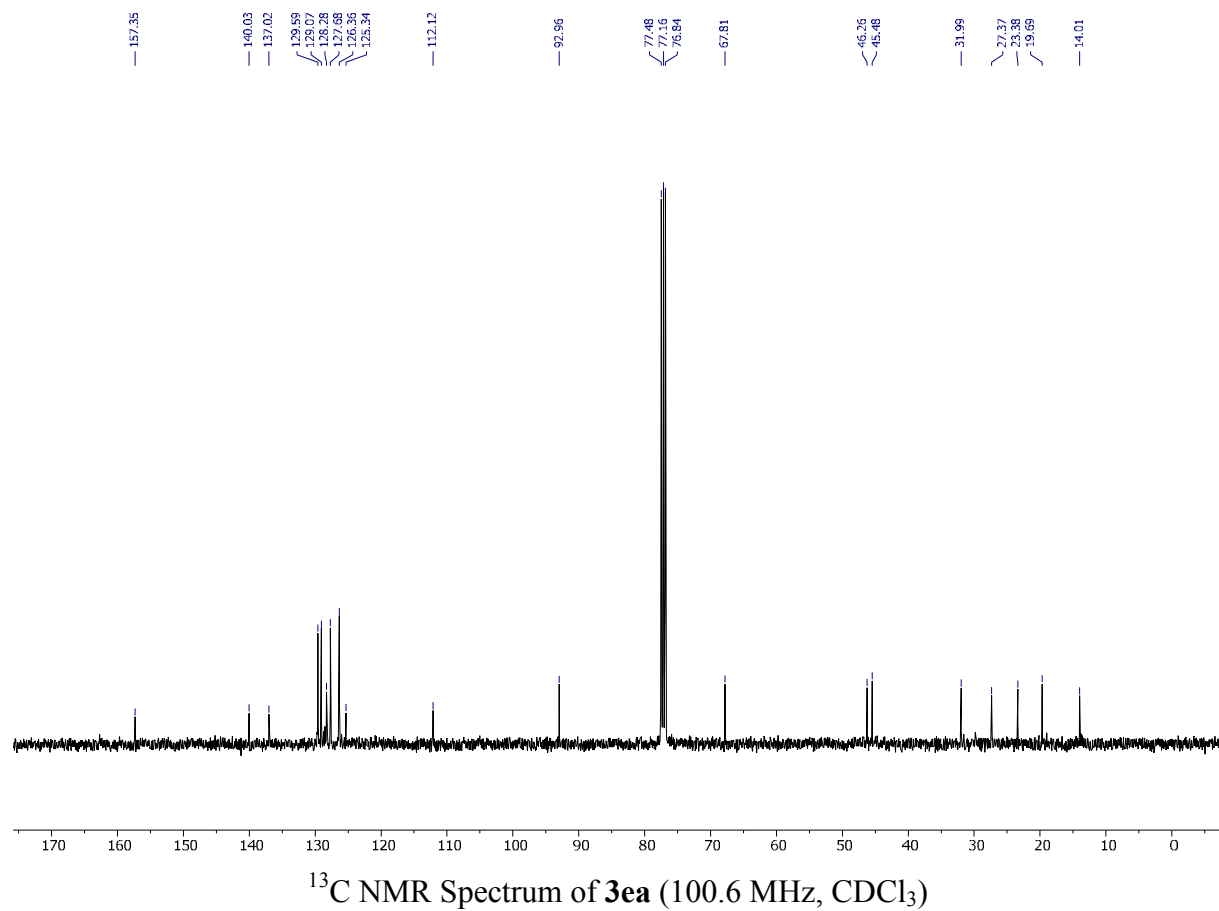

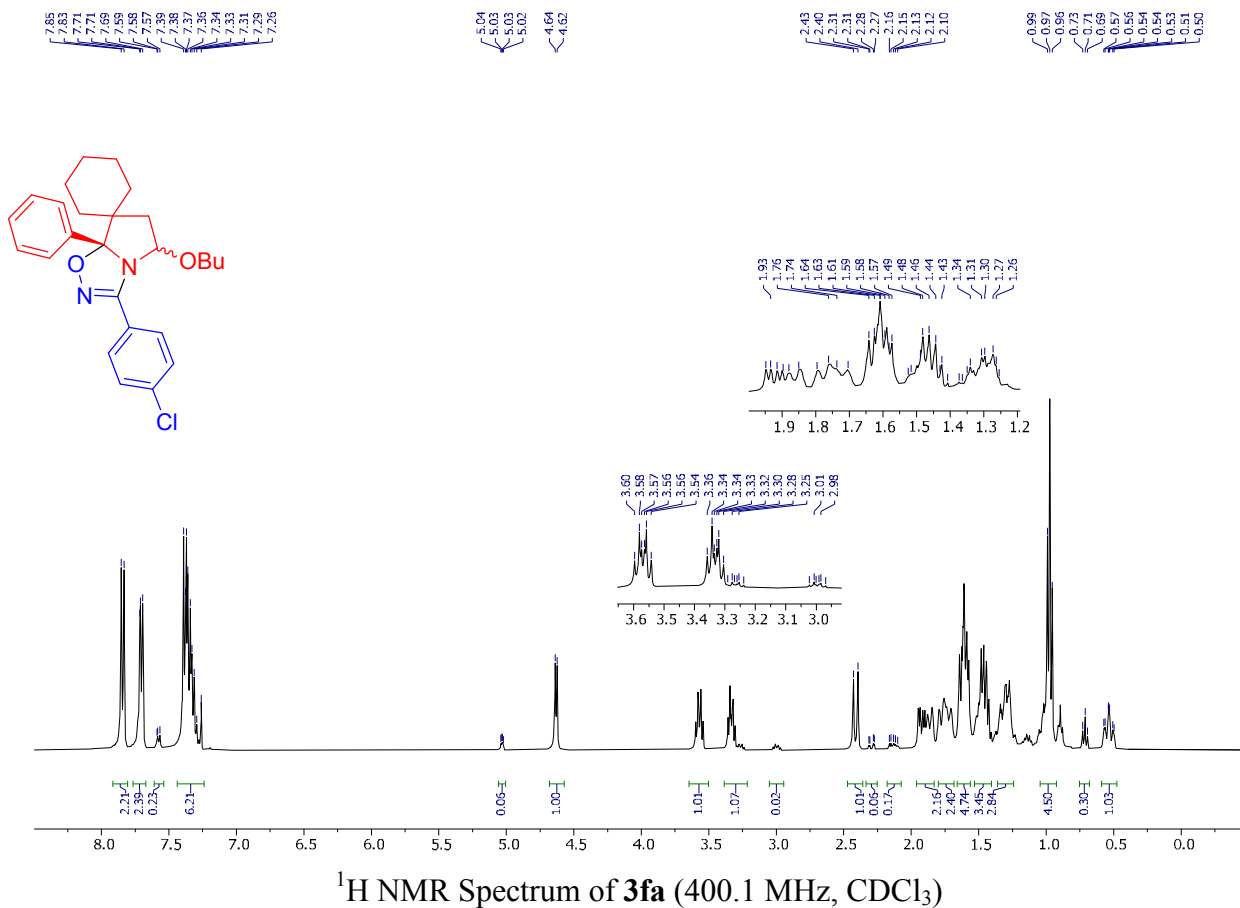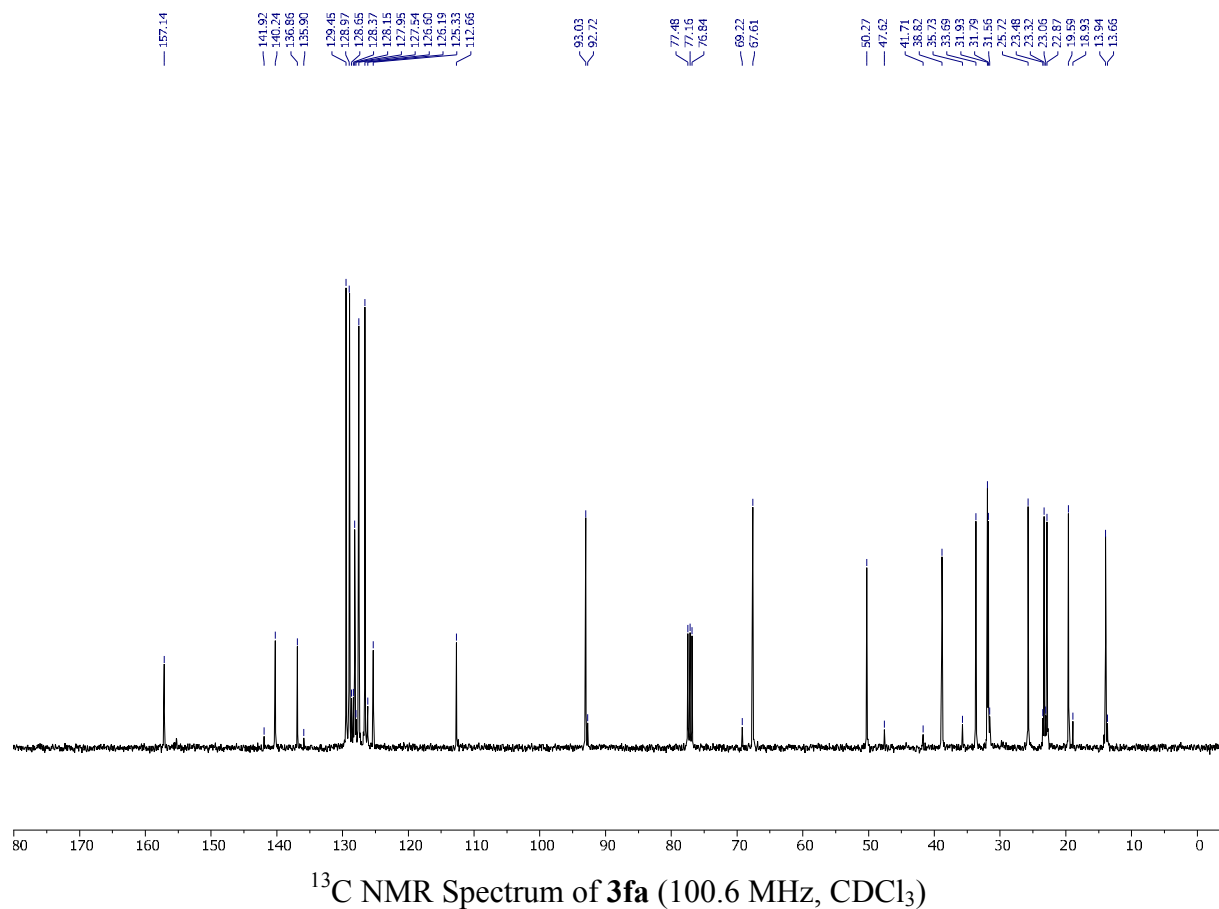

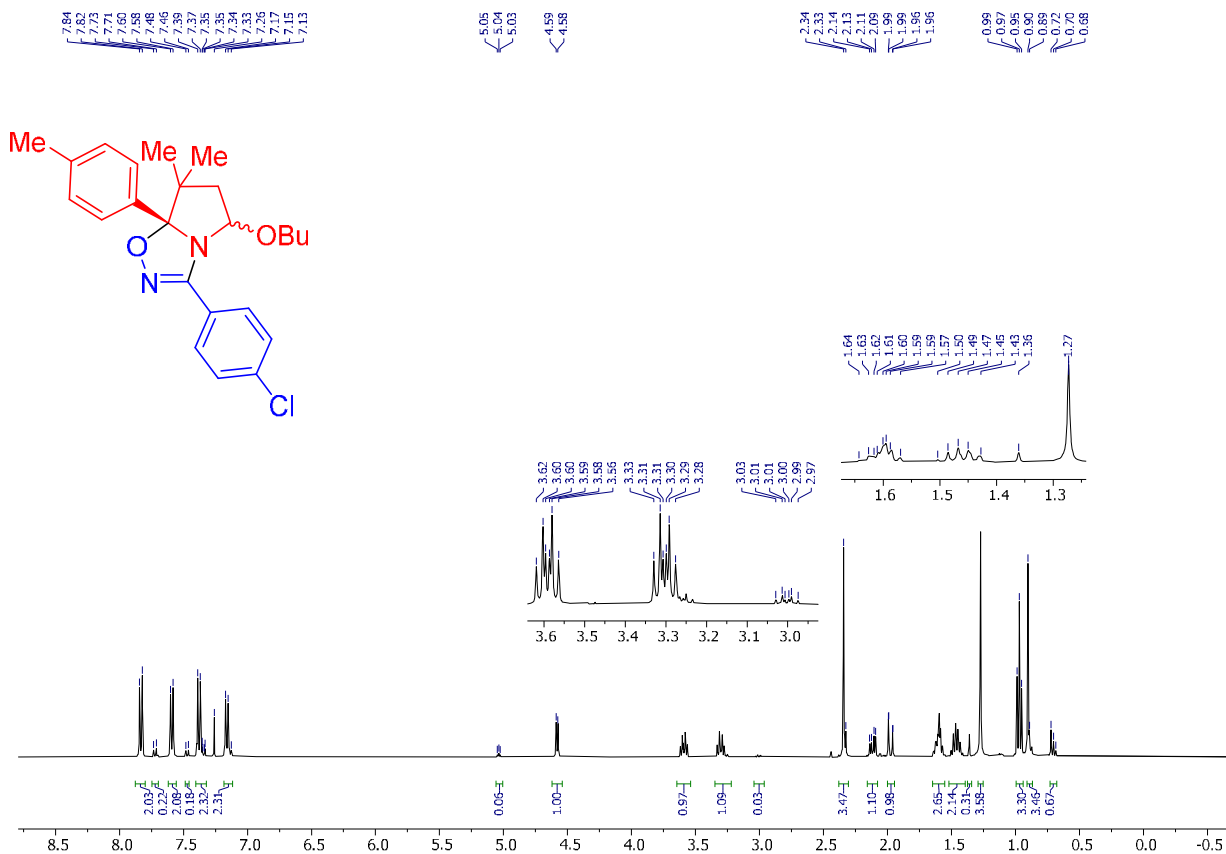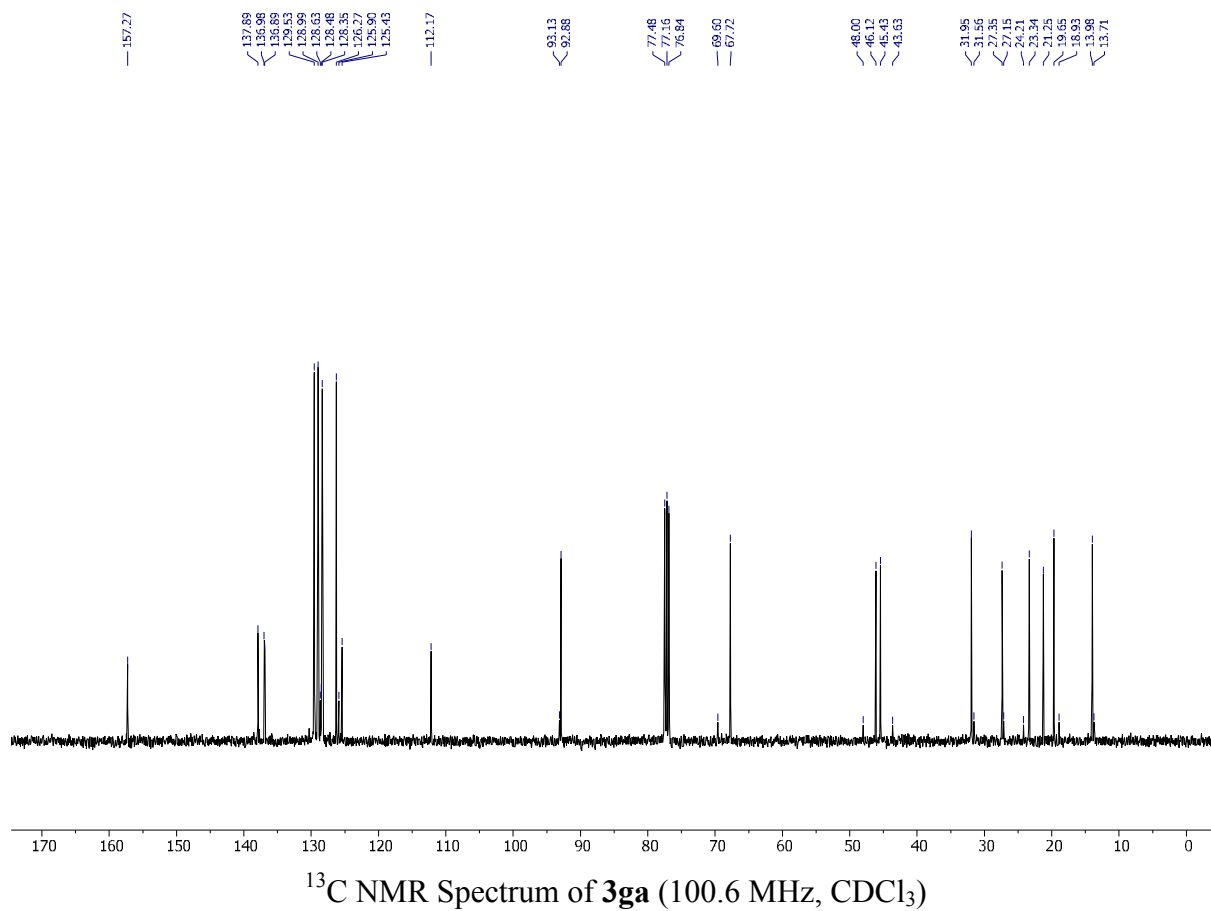

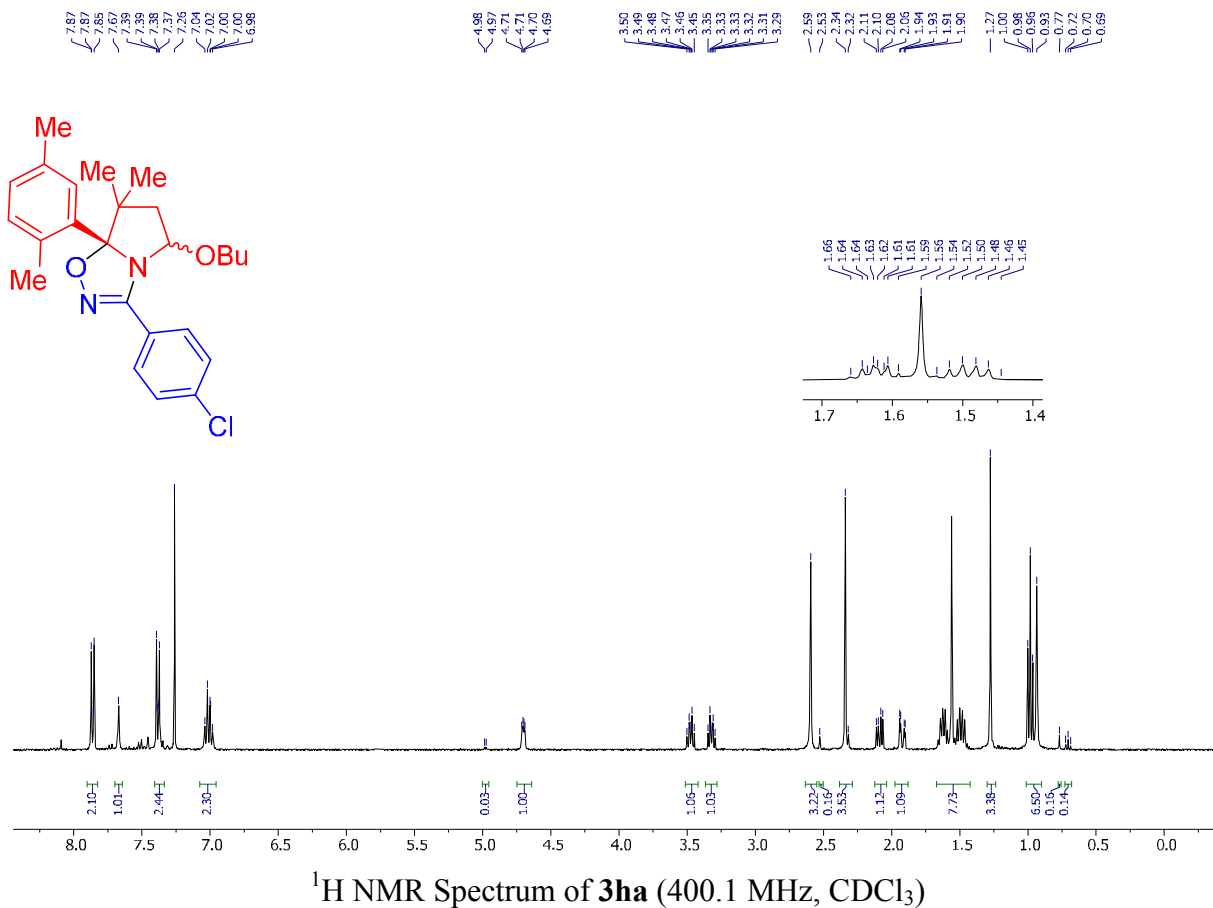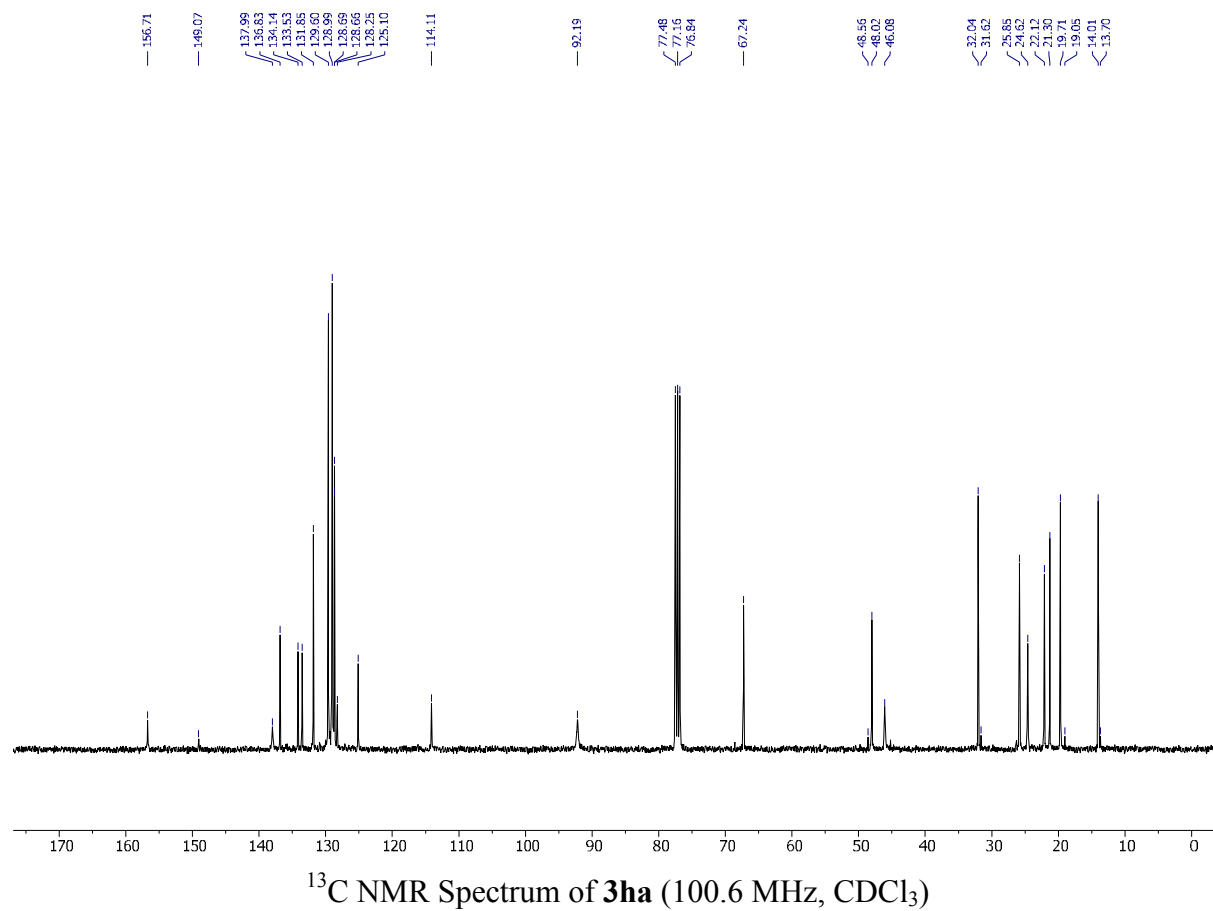

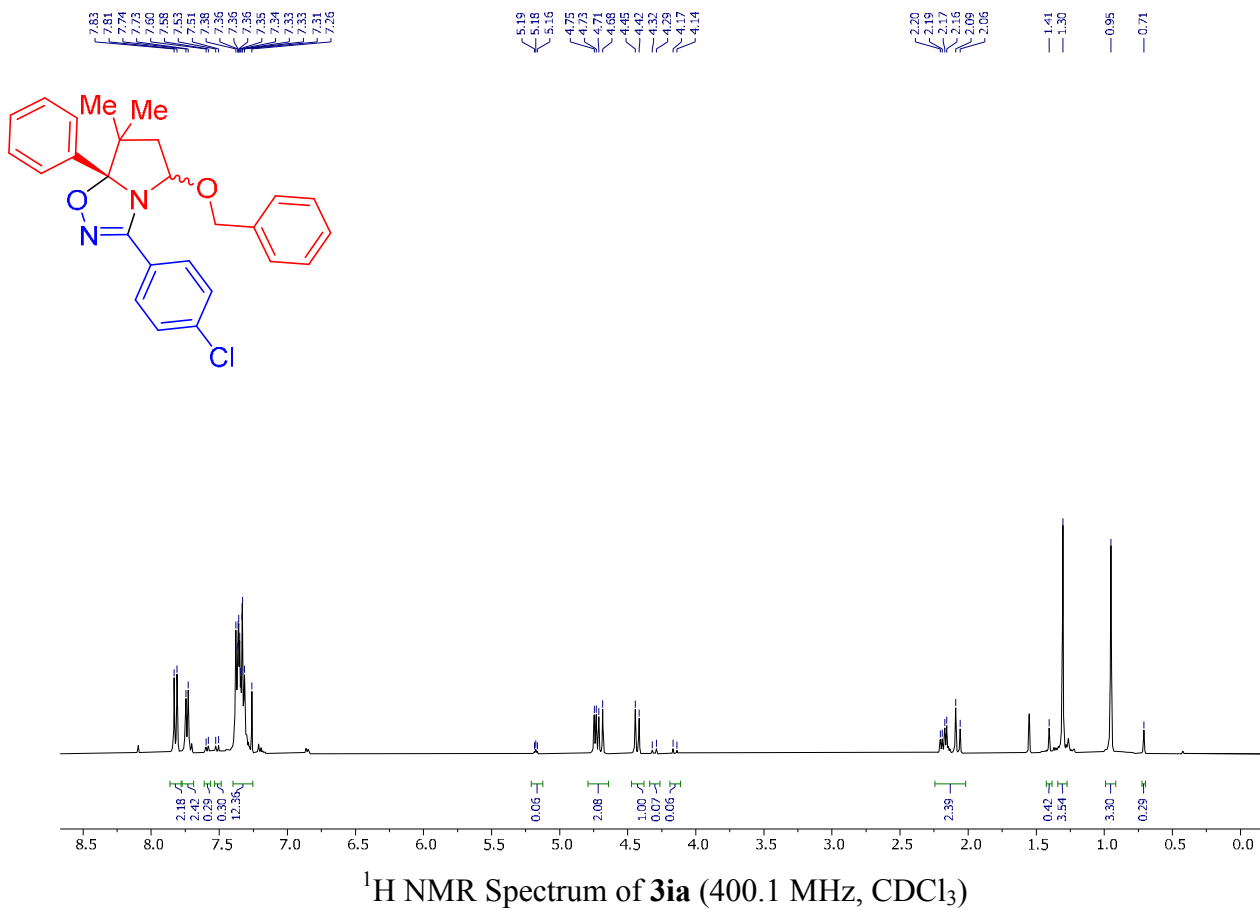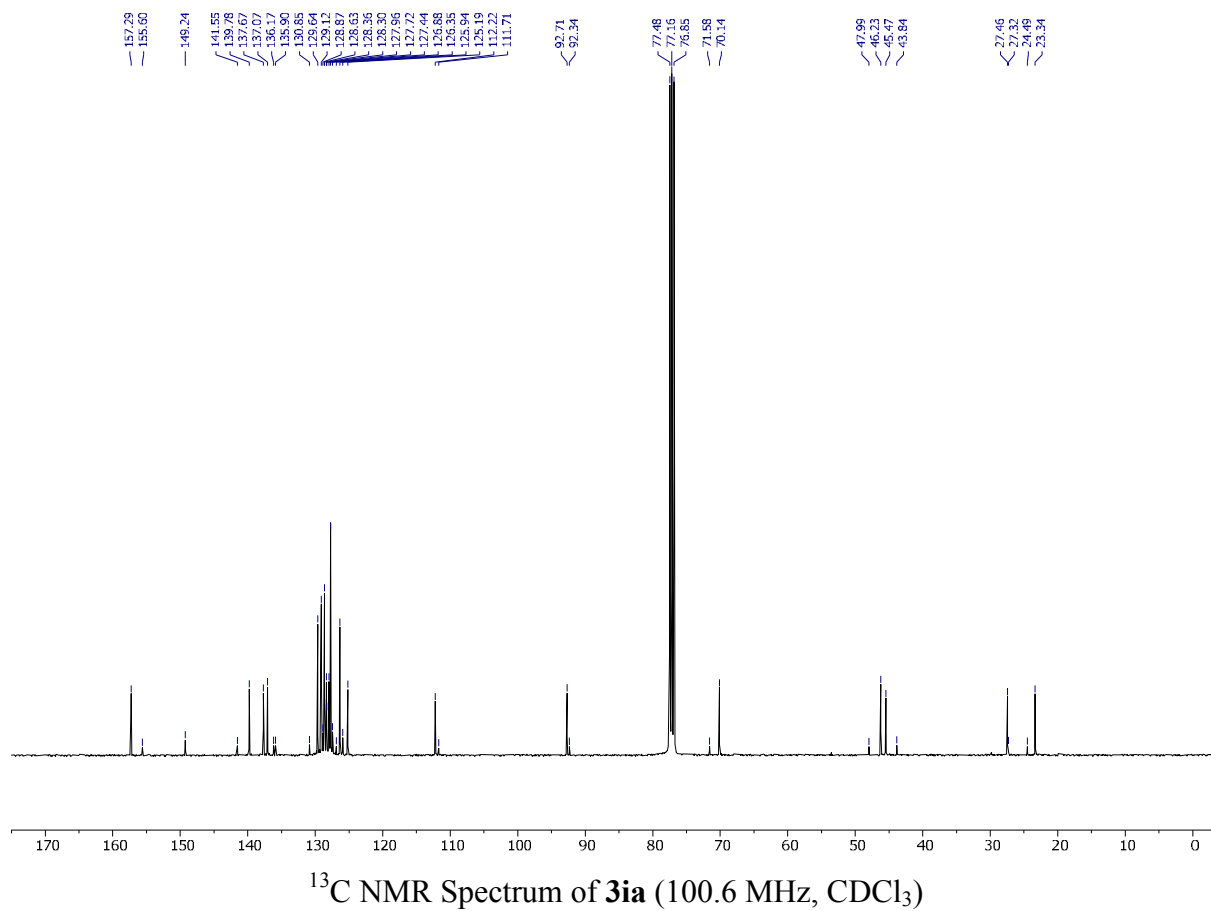

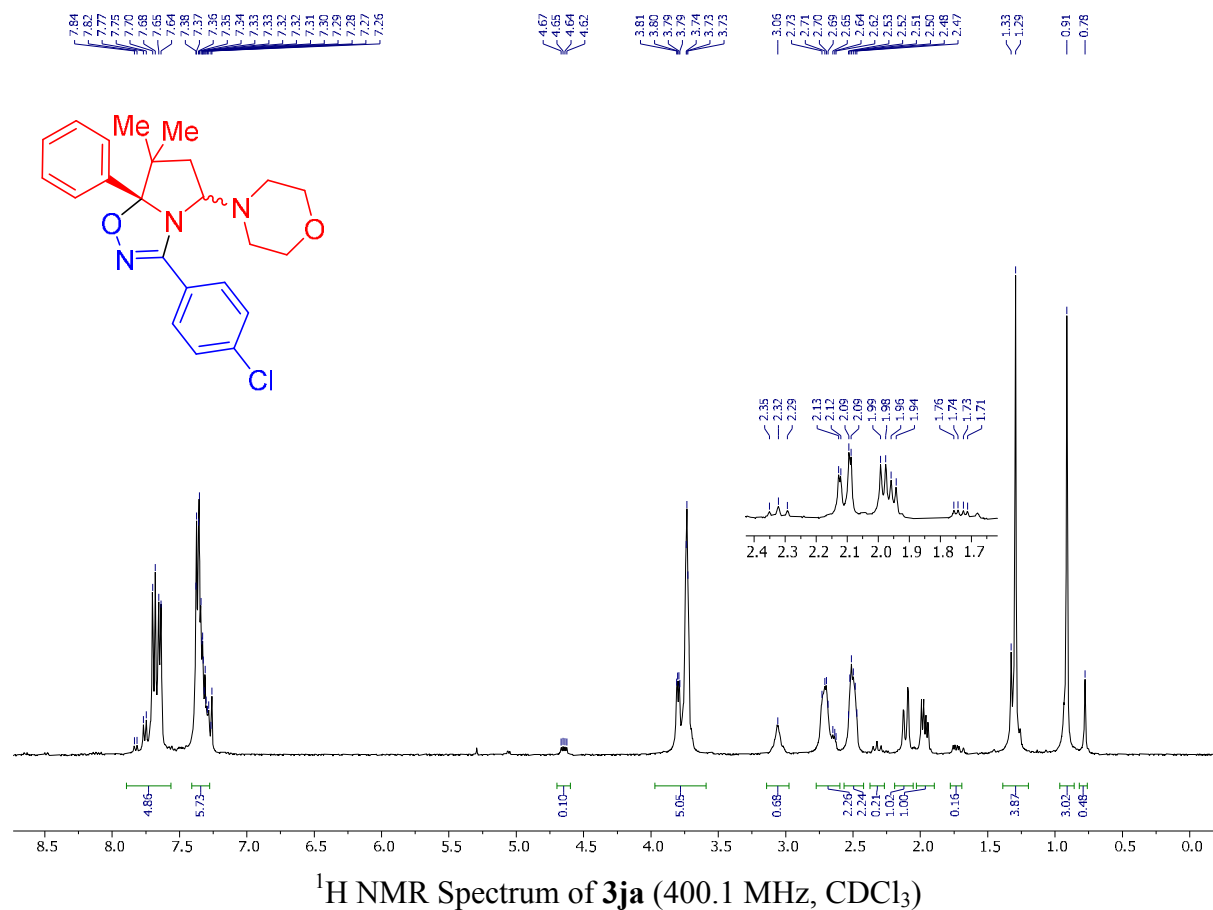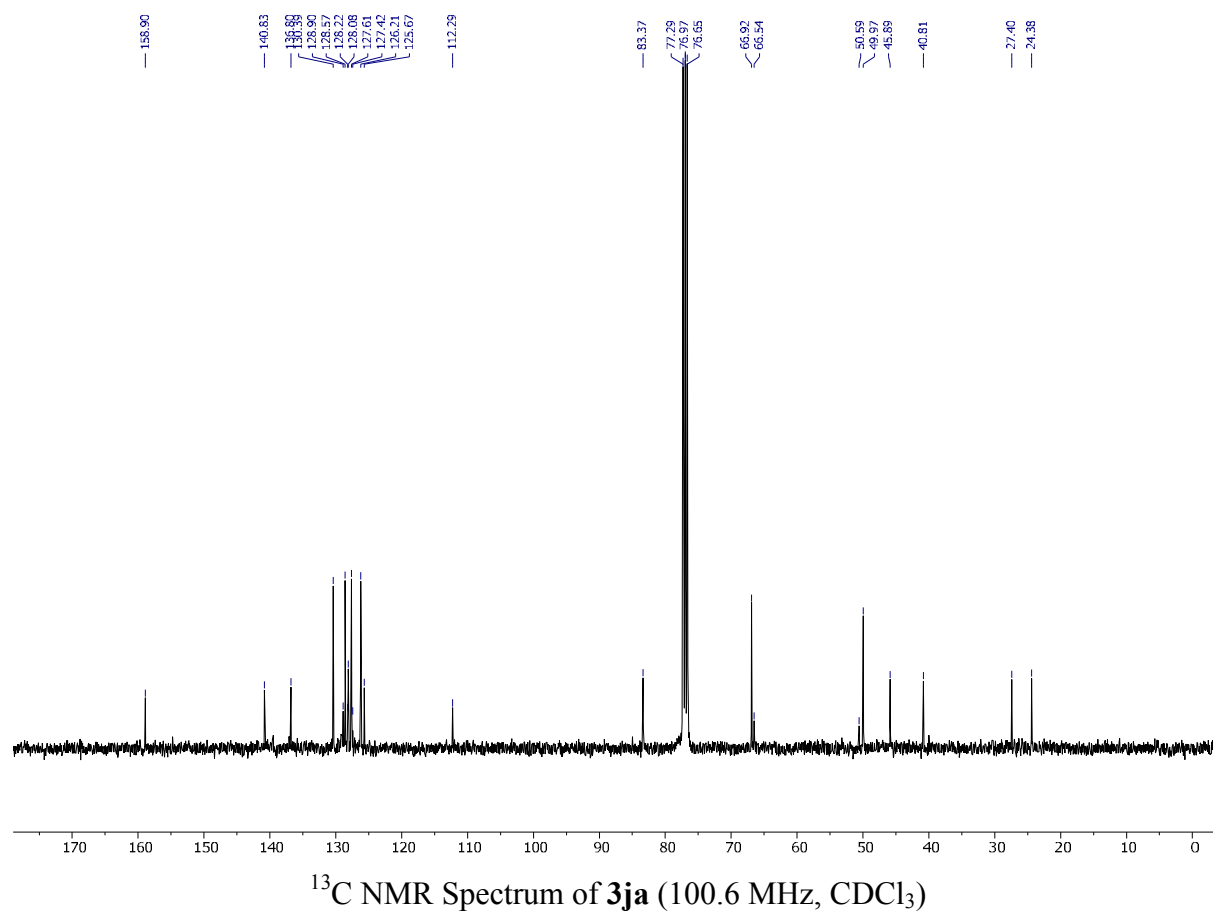



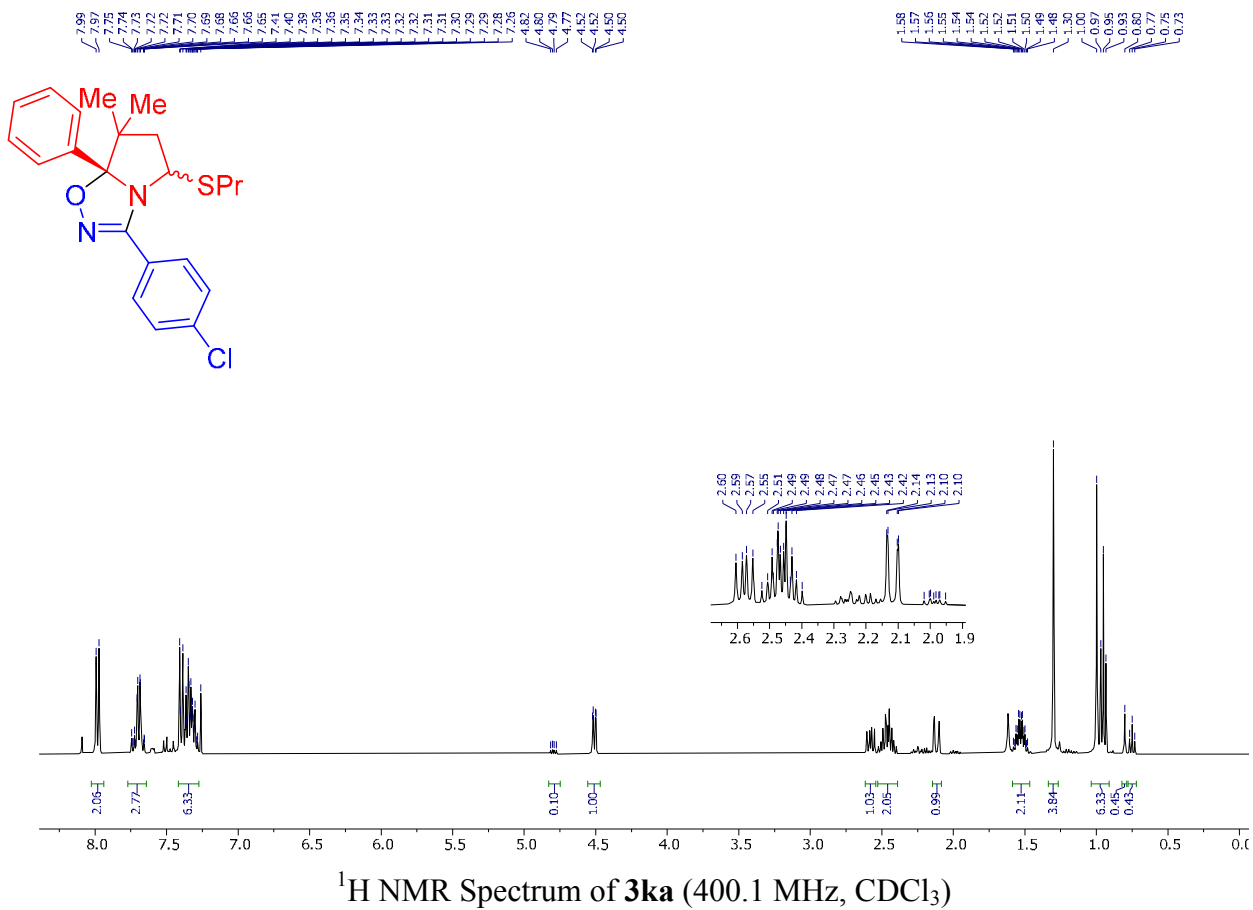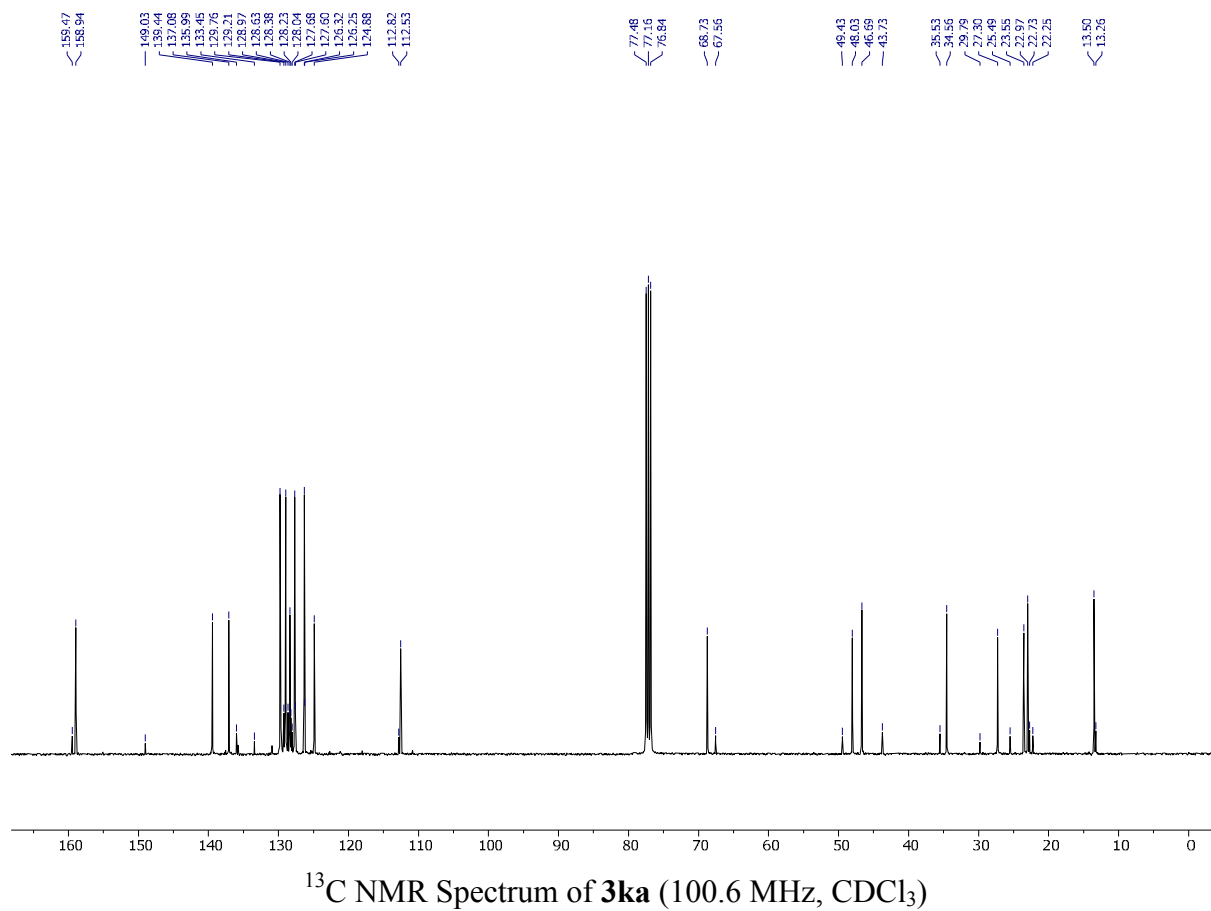

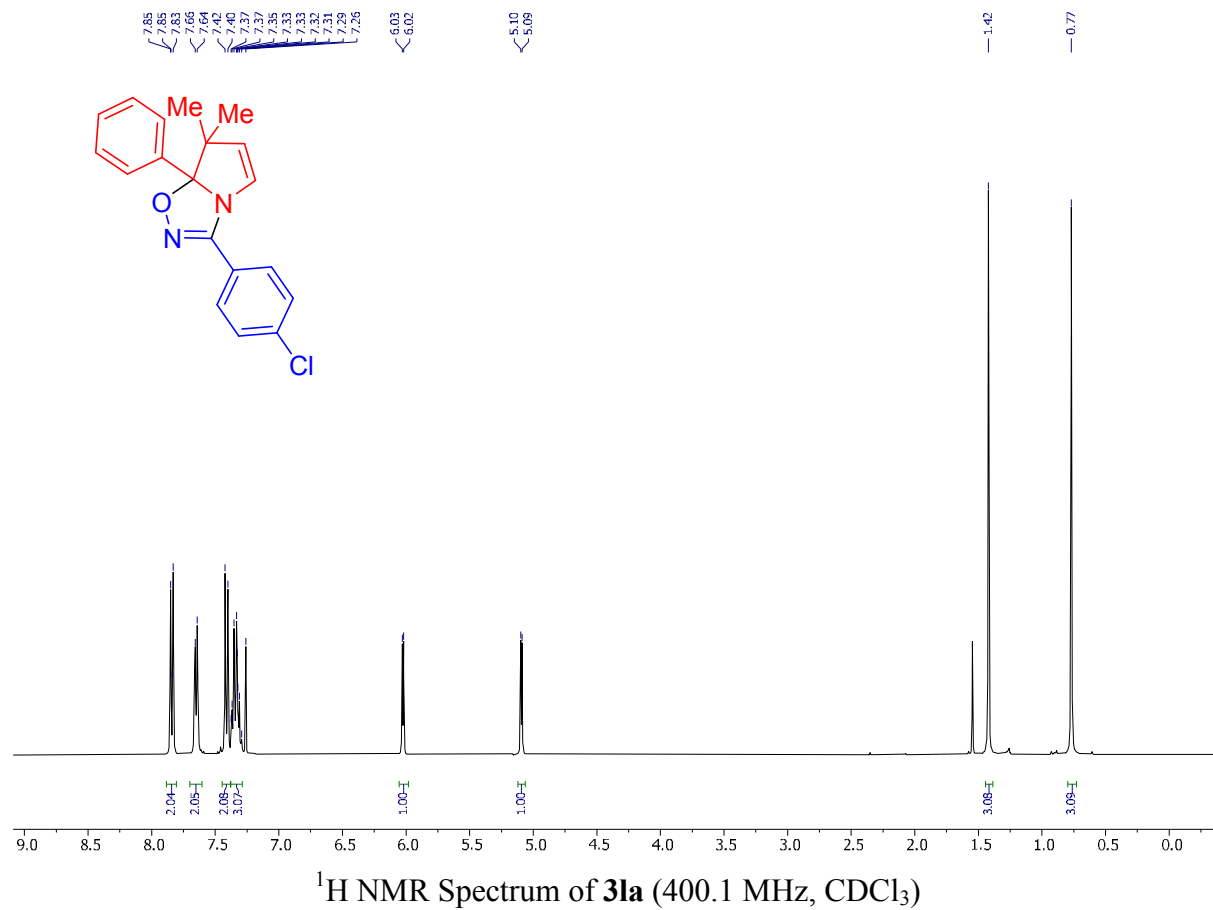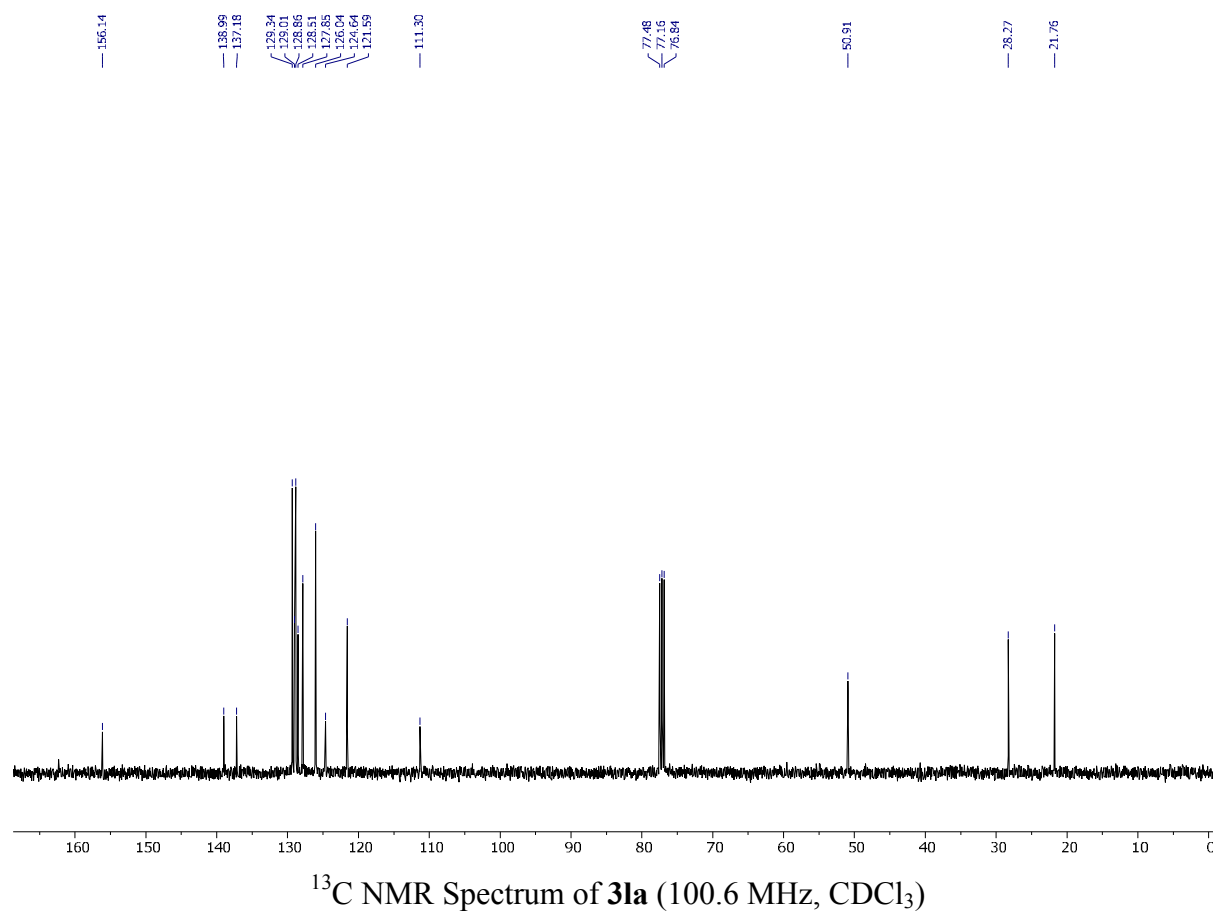

# $^1\text{H}$ and $^{13}\text{C}$ NMR Spectra of pyrrolinone 4

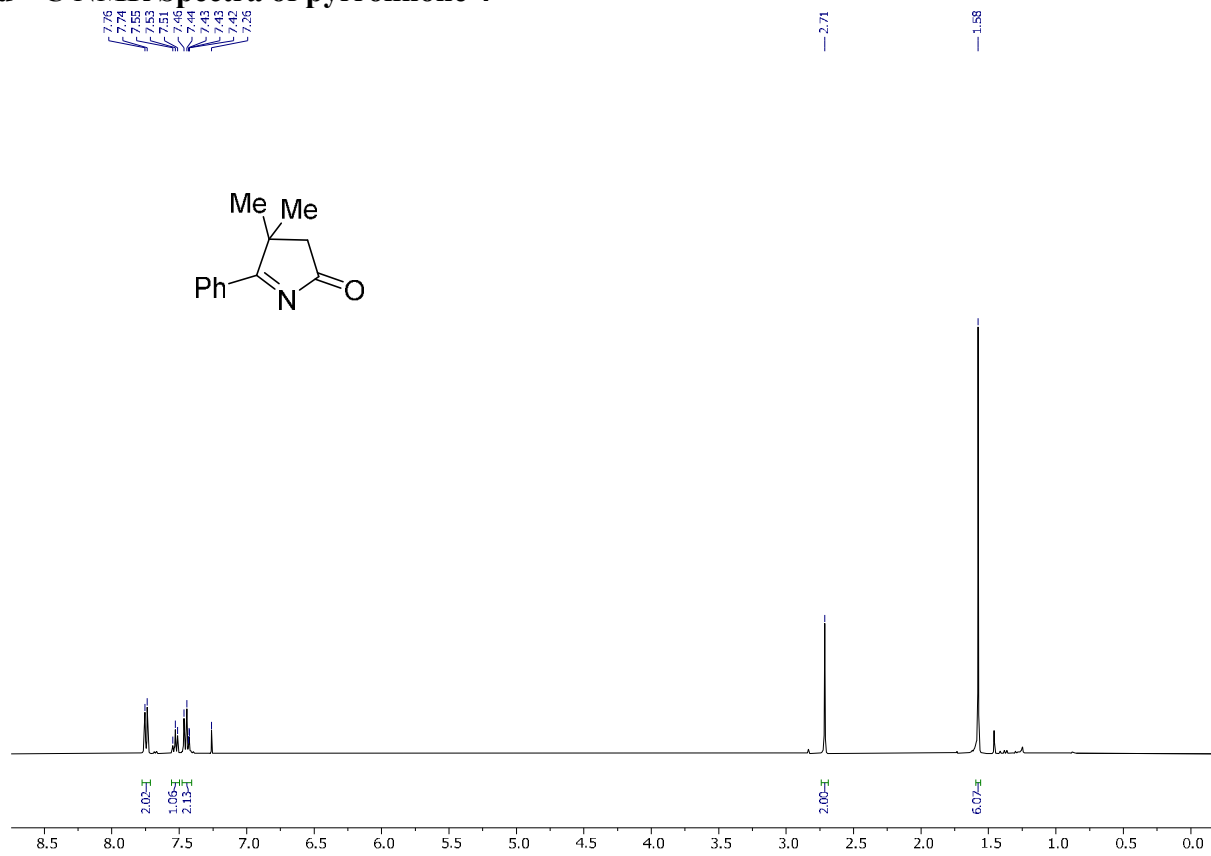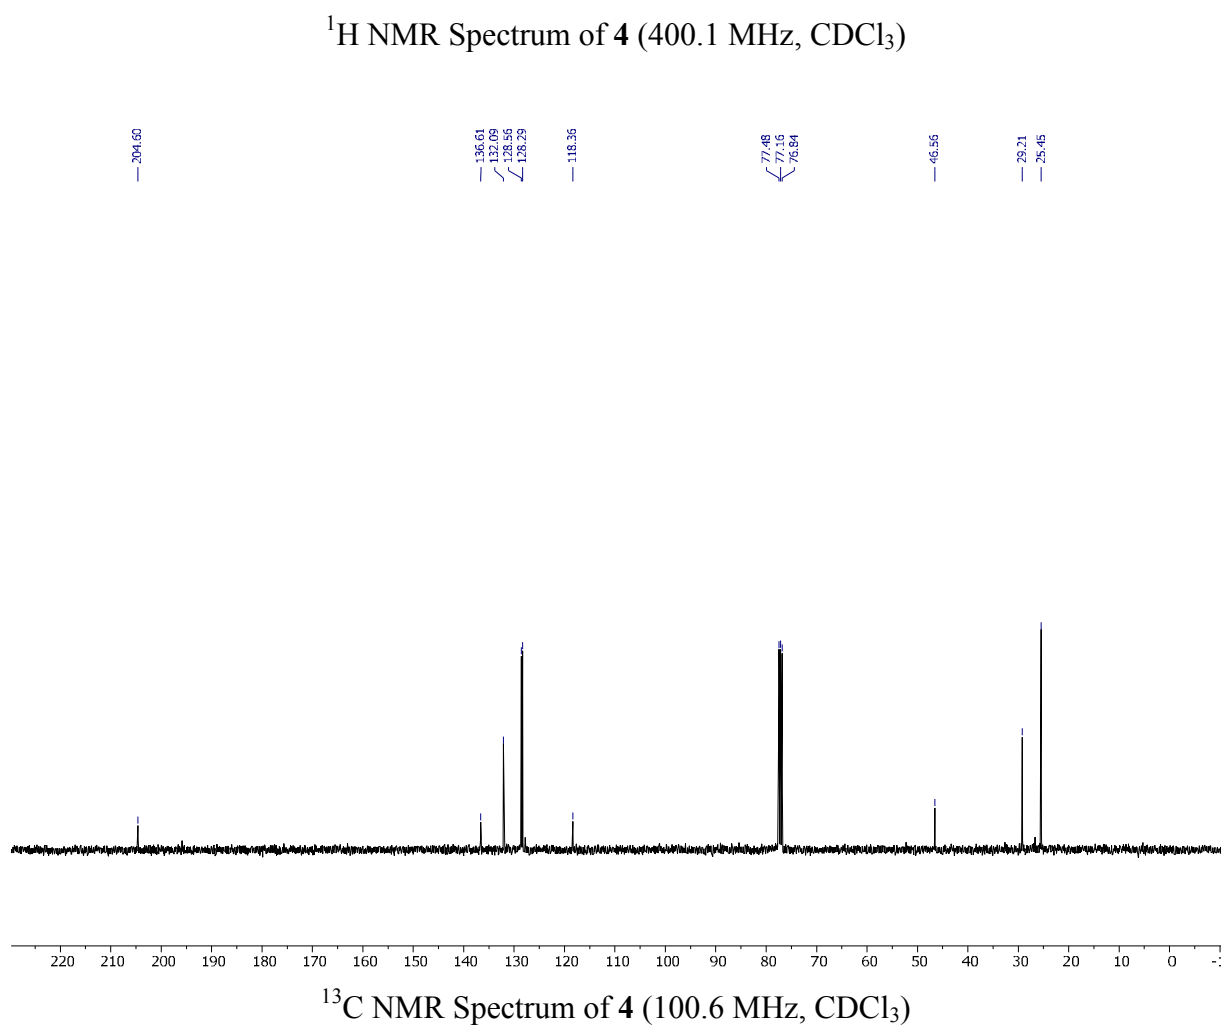

# $^1\text{H}$ and $^{13}\text{C}$ NMR Spectra of tetrahydropyrrolo[1,2-*d*]oxadiazole 5

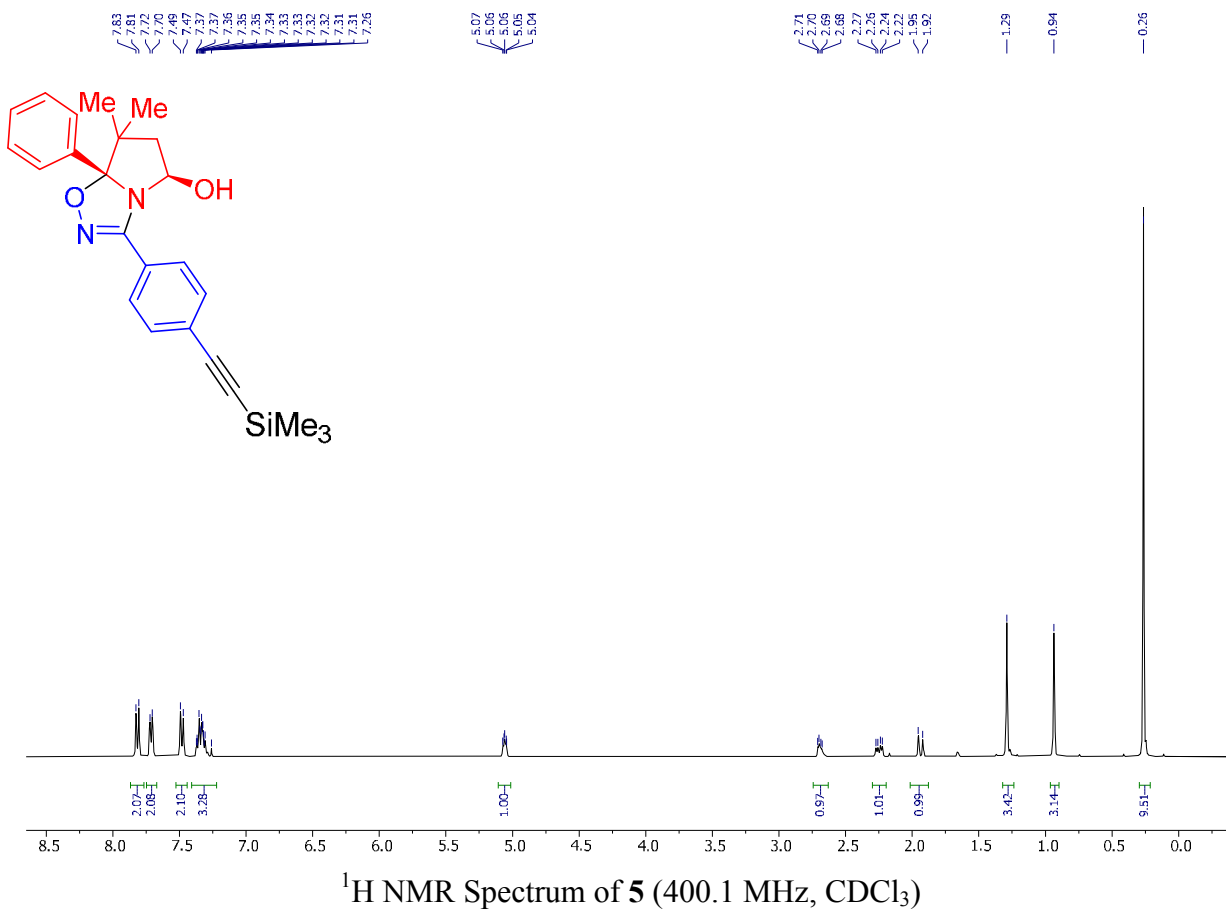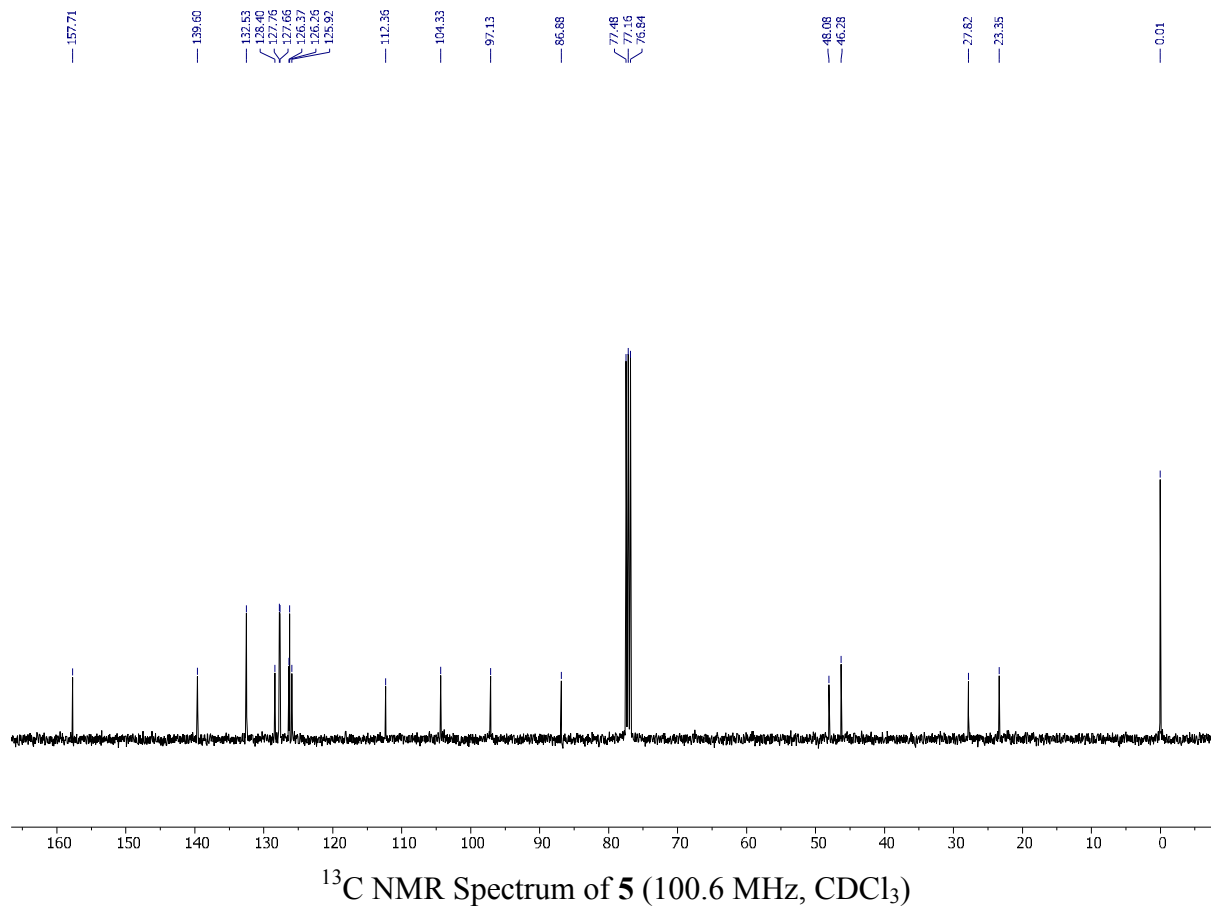

Supplement: d2ob02230c1.pdf [file d2ob02230c1.pdf]
